# Supplementary material for: Discovering Putative Prion-Like Proteins in Plasmodium falciparum: A Computational and Experimental Analysis
Source: Front Microbiol. 2018 Aug 7;9:1737. doi: 10.3389/fmicb.2018.01737 (PMC6090025; doi:10.3389/fmicb.2018.01737)
Supplement: Supplementary file 1 [file Table_1.XLSX]

## Sheet: Table S1
Table S1. - P. falciparum (isolate 3D7) prion-like proteins dataset.
The P. falciparum reference proteome (Proteome ID UP000001450, release February 2012) consisting of 5353 proteins was scanned for Q/N-rich domains, rendering 1328 proteins. These sequences were further examined with PAPA resulting in 581 proteins. Finally, these prion-like domains were analyzed with pWALTZ, which left us with a dataset of 503 prion-like proteins. The thresholds for PAPA and pWALT…
Protein names	Uniprot AC	Gene names	Gene ontology (GO)	Cross-reference (Pfam)	PAPA Score	pWALTZ score
Translation initiation factor IF-2, putative	Q8IBA3	PF3D7_0827100	cytosol [GO:0005829]; GTP binding [GO:0005525]; GTPase activity [GO:0003924]; translation initiation factor activity [GO:0003743]; translational initiation [GO:0006413]	PF00009;	0.0708672	87.705
Eukaryotic translation initiation factor 2-alpha kinase (EC 2.7.11.1)	C6KTB8	PF3D7_0628200	integral component of membrane [GO:0016021]; ATP binding [GO:0005524]; elongation factor-2 kinase activity [GO:0004686]; translation initiation factor activity [GO:0003743]; protein phosphorylation [GO:0006468]	PF00069;	0.246663	77.3371
Protein transport protein Sec24B	C0H489	PF3D7_0405100	COPII vesicle coat [GO:0030127]; zinc ion binding [GO:0008270]; ER to Golgi vesicle-mediated transport [GO:0006888]; intracellular protein transport [GO:0006886]	PF08033;PF04815;PF04811;	0.206347	84.6154
Cyclic nucleotide-specific phosphodiesterase long isoform (EC 3.1.4.17) (cGMP-specific phosphodiesterase) (EC 3.1.4.35)	Q8I5V4	PDE1 PDEalphaA PF3D7_1209500.1 PFL0475w	integral component of membrane [GO:0016021]; 3',5'-cyclic-GMP phosphodiesterase activity [GO:0047555]; metal ion binding [GO:0046872]; signal transduction [GO:0007165]	PF00233;	0.131278	83.5164
RNA guanylyltransferase (EC 3.1.3.33)	Q8I720	Pgt1 PF14_0144 PF3D7_1414600	mRNA guanylyltransferase activity [GO:0004484]; polynucleotide 5'-phosphatase activity [GO:0004651]; 7-methylguanosine mRNA capping [GO:0006370]	PF03919;PF01331;	0.0606525	75.2508
Biotin carboxylase subunit of acetyl CoA carboxylase, putative (EC 6.3.4.14) (EC 6.4.1.2)	Q8IKE1	ACC1 PF14_0664 PF3D7_1469600	acetyl-CoA carboxylase complex [GO:0009317]; apicoplast [GO:0020011]; biotin carboxylase complex [GO:0009343]; acetyl-CoA carboxylase activity [GO:0003989]; ATP binding [GO:0005524]; biotin binding [GO:0009374]; biotin carboxylase activity [GO:0004075]; metal ion binding [GO:0046872]; fatty acid biosynthetic process [GO:0006633]	PF02785;PF00289;PF00364;PF01039;PF02786;	0.0678267	80.7771
Acid phosphatase, putative (EC 3.1.3.2)	Q8ILG1	PF14_0282 PF3D7_1430300	acid phosphatase activity [GO:0003993]; diphosphoinositol-pentakisphosphate kinase activity [GO:0033857]; inositol heptakisphosphate kinase activity [GO:0000829]; inositol hexakisphosphate kinase activity [GO:0000828]; inositol metabolic process [GO:0006020]; inositol phosphate biosynthetic process [GO:0032958]	PF00328;	0.110385	75.8401
Myosin C	Q8IE50	PF3D7_1329100	myosin complex [GO:0016459]; actin binding [GO:0003779]; ATP binding [GO:0005524]; microfilament motor activity [GO:0000146]; motor activity [GO:0003774]; actin filament-based movement [GO:0030048]; cytoskeleton organization [GO:0007010]	PF00063;PF02736;PF00400;	0.074117	78.7227
Uncharacterized protein	C0H4Q1	PF3D7_0729100	allantoicase activity [GO:0004037]; allantoin catabolic process [GO:0000256]	PF03561;	0.149749	79.6782
Isoleucine--tRNA ligase, putative (EC 6.1.1.5)	Q8IDZ9	PF3D7_1332900	cytoplasm [GO:0005737]; aminoacyl-tRNA editing activity [GO:0002161]; ATP binding [GO:0005524]; isoleucine-tRNA ligase activity [GO:0004822]; tRNA binding [GO:0000049]; isoleucyl-tRNA aminoacylation [GO:0006428]	PF08264;PF00133;	0.0768604	76.1745
Cysteine repeat modular protein 1	Q8I339	PF3D7_0911300	anchored component of external side of plasma membrane [GO:0031362]; integral component of membrane [GO:0016021]; intracellular [GO:0005622]; intracellular receptor signaling pathway [GO:0030522]; intracellular transport [GO:0046907]	PF07699;PF00051;	0.178603	82.2742
Histone-lysine N-methyltransferase, H3 lysine-4 specific (EC 2.1.1.43)	Q8I5K3	PF3D7_1221000 PFL1010c	nuclear periphery [GO:0034399]; nucleus [GO:0005634]; histone methyltransferase activity (H3-K4 specific) [GO:0042800]; metal ion binding [GO:0046872]; antigenic variation [GO:0020033]	PF00628;	0.147928	79.0253
Reticulocyte-binding protein PFD0110w	P86148	PFD0110w	apical complex [GO:0020007]; integral component of membrane [GO:0016021]; membrane [GO:0016020]; mitochondrion [GO:0005739]; rhoptry [GO:0020008]; heparin binding [GO:0008201]; host cell surface receptor binding [GO:0046789]; cell-cell adhesion [GO:0098609]		0.0595656	83.389
Reticulocyte binding protein homologue 4	C0H496	PF3D7_0424200	apical part of cell [GO:0045177]; integral component of membrane [GO:0016021]; rhoptry [GO:0020008]; heparin binding [GO:0008201]; host cell surface receptor binding [GO:0046789]; entry into host cell [GO:0030260]		0.129793	80.3312
Uncharacterized protein	O97306	PF3D7_0323800	apicoplast [GO:0020011]		0.191961	83.1183
Uncharacterized protein	Q8I604	PF3D7_1204200 PFL0205w	apicoplast [GO:0020011]		0.157582	80.4108
Uncharacterized protein	Q8IEC0	PF3D7_1319600	apicoplast [GO:0020011]	PF14733;	0.0527664	79.3916
Uncharacterized protein	Q8ILH5	PF14_0268 PF3D7_1428900	apicoplast [GO:0020011]		0.0785026	78.0538
Ubiquitin-activating enzyme	Q8ID54	PF3D7_1365400	apicoplast [GO:0020011]; integral component of membrane [GO:0016021]; membrane [GO:0016020]; ATPase activity [GO:0016887]; catalytic activity [GO:0003824]; ubiquitin-like modifier activating enzyme activity [GO:0008641]; regulation of cell cycle process [GO:0010564]; ubiquitin-dependent ERAD pathway [GO:0030433]	PF00899;	0.191937	82.4972
E3 ubiquitin-protein ligase, putative	O77347	PF3D7_0312100	apicoplast [GO:0020011]; integral component of membrane [GO:0016021]; ligase activity [GO:0016874]; ubiquitin protein ligase activity [GO:0061630]; ubiquitin-protein transferase activity [GO:0004842]; proteasome-mediated ubiquitin-dependent protein catabolic process [GO:0043161]; protein polyubiquitination [GO:0000209]; protein ubiquitination involved in ubiquitin-dependent protein catabolic proc…	PF13639;	0.100822	79.0253
E3 ubiquitin-protein ligase, putative	O77387	PF3D7_0316900	apicoplast [GO:0020011]; integral component of membrane [GO:0016021]; ligase activity [GO:0016874]; ubiquitin-protein transferase activity [GO:0004842]; zinc ion binding [GO:0008270]		0.0634268	78.1016
Replication factor c protein, putative	Q8I233	PF3D7_0111300	DNA replication factor C complex [GO:0005663]; ATP binding [GO:0005524]; DNA replication [GO:0006260]	PF00004;	0.140279	83.1501
ATPase, putative	Q8IAX9	PF3D7_0814300	ATP binding [GO:0005524]	PF00004;	0.0824549	78.7227
Uncharacterized protein	Q8IDY9	PF3D7_1333900	ATP binding [GO:0005524]	PF01443;	0.0824786	74.7889
Uncharacterized protein	Q8IKK6	PF14_0599 PF3D7_1462900	ATP binding [GO:0005524]	PF00004;	0.266692	83.5642
Probable ATP-dependent helicase PF08_0048 (EC 3.6.4.-)	C0H4W3	PF08_0048	cytoplasm [GO:0005737]; membrane [GO:0016020]; nucleus [GO:0005634]; ATP binding [GO:0005524]; ATP-dependent helicase activity [GO:0008026]; DNA binding [GO:0003677]; covalent chromatin modification [GO:0016569]; regulation of transcription, DNA-templated [GO:0006355]; transcription, DNA-templated [GO:0006351]	PF00271;PF07529;PF00176;	0.11611	79.8534
Pre-mRNA-splicing helicase BRR2, putative (EC 3.6.4.13)	Q8IFP1	PF3D7_0422500	cytoplasm [GO:0005737]; nucleolus [GO:0005730]; spliceosomal complex [GO:0005681]; ATP binding [GO:0005524]; ATP-dependent RNA helicase activity [GO:0004004]; nucleic acid binding [GO:0003676]; RNA secondary structure unwinding [GO:0010501]; RNA splicing, via transesterification reactions [GO:0000375]	PF00270;PF00271;PF02889;	0.0713398	82.3538
Calcium-dependent protein kinase 6 (EC 2.7.11.17) (Calcium-dependent protein kinase, putative)	Q8IID5	PF11_0239 PF3D7_1122800	cytoplasm [GO:0005737]; nucleus [GO:0005634]; ATP binding [GO:0005524]; calcium ion binding [GO:0005509]; calcium-dependent protein serine/threonine kinase activity [GO:0009931]; calmodulin binding [GO:0005516]; calmodulin-dependent protein kinase activity [GO:0004683]; intracellular signal transduction [GO:0035556]; peptidyl-serine phosphorylation [GO:0018105]; protein autophosphorylation [GO:00…	PF13202;PF00069;	0.0844511	75.7126
Serine/threonine protein kinase, putative (EC 2.7.11.1)	O77328	PF3D7_0309200	chromosome passenger complex [GO:0032133]; condensed nuclear chromosome, centromeric region [GO:0000780]; spindle microtubule [GO:0005876]; spindle midzone [GO:0051233]; spindle pole centrosome [GO:0031616]; ATP binding [GO:0005524]; histone serine kinase activity [GO:0035174]; protein serine/threonine kinase activity [GO:0004674]; mitotic spindle organization [GO:0007052]; protein phosphorylatio…	PF00069;	0.200847	76.2064
NIMA related kinase 1 (EC 2.7.11.1) (NIMA-related protein kinase (Pfnek-1))	Q8I5D5	PF3D7_1228300 PFL1370w	ATP binding [GO:0005524]; protein kinase activity [GO:0004672]; protein phosphorylation [GO:0006468]	PF00069;	0.241277	76.7797
Tyrosine kinase-like protein (EC 2.7.10.2)	Q8IDK6	PF3D7_1349300	cytoplasm [GO:0005737]; ATP binding [GO:0005524]; non-membrane spanning protein tyrosine kinase activity [GO:0004715]; protein kinase activity [GO:0004672]; signal transducer activity [GO:0004871]; intracellular signal transduction [GO:0035556]; protein phosphorylation [GO:0006468]	PF07714;PF07647;	0.122817	81.6531
DNA repair and recombination protein RAD54,putative (EC 3.6.4.12)	Q8IAN4	PF3D7_0803400	ATP binding [GO:0005524]; damaged DNA binding [GO:0003684]; hydrolase activity [GO:0016787]; DNA recombination [GO:0006310]; double-strand break repair via homologous recombination [GO:0000724]	PF00271;PF00176;	0.145478	80.1401
DNA mismatch repair protein MSH6, putative	Q8I447	PF3D7_0505500	mismatch repair complex [GO:0032300]; ATP binding [GO:0005524]; damaged DNA binding [GO:0003684]; DNA-dependent ATPase activity [GO:0008094]; heteroduplex DNA loop binding [GO:0000404]; DNA repair [GO:0006281]; maintenance of DNA repeat elements [GO:0043570]; mismatch repair [GO:0006298]	PF01624;PF05192;PF05190;PF00488;	0.104385	75.0597
ATP-dependent RNA helicase, putative (EC 3.6.4.13)	Q8I2A4	PF3D7_0103600	cytoplasm [GO:0005737]; integral component of membrane [GO:0016021]; nucleolus [GO:0005730]; ATP binding [GO:0005524]; ATP-dependent RNA helicase activity [GO:0004004]; nucleic acid binding [GO:0003676]; RNA secondary structure unwinding [GO:0010501]	PF00270;PF00271;	0.0574657	73.6582
DEAD/DEAH box helicase, putative	Q8IJ90	PF10_0309 PF3D7_1031500	cytoplasm [GO:0005737]; nucleolus [GO:0005730]; ATP binding [GO:0005524]; ATP-dependent RNA helicase activity [GO:0004004]; nucleic acid binding [GO:0003676]; RNA secondary structure unwinding [GO:0010501]	PF00270;PF00271;	0.147007	85.7461
Protein kinase (Tyrosine kinase-like protein) (EC 2.7.10.2)	Q8IIF4	TKL-2 PF11_0220 PF3D7_1121300	host cell cytosol [GO:0044164]; plasma membrane [GO:0005886]; ATP binding [GO:0005524]; non-membrane spanning protein tyrosine kinase activity [GO:0004715]; protein serine/threonine kinase activity [GO:0004674]; cell surface receptor signaling pathway [GO:0007166]	PF07714;	0.214124	85.762
Exported serine/threonine protein kinase (EC 2.7.11.1)	Q8IBR9	PF3D7_0718100	Maurer's cleft [GO:0020036]; membrane [GO:0016020]; ATP binding [GO:0005524]; protein serine/threonine kinase activity [GO:0004674]; protein phosphorylation [GO:0006468]		0.229905	76.8115
Ser/Thr protein kinase, putative (Serine/threonine protein kinase, putative) (EC 2.7.11.1)	Q8IHR5	PF11_0464 PF3D7_1145200	ATP binding [GO:0005524]; protein serine/threonine kinase activity [GO:0004674]	PF00069;	0.0829939	80.0764
Tyrosine kinase-like protein, putative (EC 2.7.10.2)	C6KT74	PF3D7_0623800	ATP binding [GO:0005524]; non-membrane spanning protein tyrosine kinase activity [GO:0004715]; protein kinase activity [GO:0004672]; protein phosphorylation [GO:0006468]	PF00069;	0.190487	80.2038
Cdc2-related protein kinase 4 (EC 2.7.11.22)	O77385	PF3D7_0317200	ATP binding [GO:0005524]; cyclin-dependent protein serine/threonine kinase activity [GO:0004693]; protein serine/threonine kinase activity [GO:0004674]; protein phosphorylation [GO:0006468]	PF00069;	0.0638019	75.2667
Serine/threonine protein kinase, putative (EC 2.7.11.1)	Q8IL57	PF14_0392 PF3D7_1441300	intracellular [GO:0005622]; ATP binding [GO:0005524]; protein serine/threonine kinase activity [GO:0004674]; intracellular signal transduction [GO:0035556]; peptidyl-serine phosphorylation [GO:0018105]; peptidyl-threonine phosphorylation [GO:0018107]; protein phosphorylation [GO:0006468]	PF00069;	0.230099	78.3723
Serine/threonine protein kinase, FIKK family (EC 2.7.11.1)	C0H4R8	PF3D7_0805700	ATP binding [GO:0005524]; protein serine/threonine kinase activity [GO:0004674]	PF00069;	0.0583502	76.7478
Protein kinase 1 (EC 2.7.11.1)	C0H4W5	PF3D7_0821100	ATP binding [GO:0005524]; protein kinase activity [GO:0004672]	PF00069;	0.119534	79.519
Serine/threonine protein kinase, putative (EC 2.7.11.1)	Q8I265	PF3D7_0107600	integral component of membrane [GO:0016021]; ATP binding [GO:0005524]; protein kinase activity [GO:0004672]; protein serine/threonine kinase activity [GO:0004674]; protein phosphorylation [GO:0006468]	PF00069;	0.321165	79.3438
Protein kinase, putative (EC 2.7.10.2)	Q8I2P8	PF3D7_0926100	ATP binding [GO:0005524]; non-membrane spanning protein tyrosine kinase activity [GO:0004715]	PF00069;	0.292446	79.4075
Calcium/calmodulin-dependent protein kinase,putative (EC 2.7.11.17)	Q8IIV3	PF11_0060 PF3D7_1104900	cytoplasm [GO:0005737]; nucleus [GO:0005634]; ATP binding [GO:0005524]; calcium-dependent protein serine/threonine kinase activity [GO:0009931]; calmodulin binding [GO:0005516]; calmodulin-dependent protein kinase activity [GO:0004683]; intracellular signal transduction [GO:0035556]; peptidyl-serine phosphorylation [GO:0018105]; protein autophosphorylation [GO:0046777]	PF00069;	0.0639865	81.8442
ABC transporter I family member 1, putative	O97278	PF3D7_0319700	integral component of membrane [GO:0016021]; ATP binding [GO:0005524]; ATPase activity [GO:0016887]; transporter activity [GO:0005215]	PF00005;	0.103001	81.9238
ATP-dependent protease ATPase subunit ClpY	Q8I377	PF3D7_0907400	HslUV protease complex [GO:0009376]; ATP binding [GO:0005524]; ATPase activity [GO:0016887]; peptidase activity, acting on L-amino acid peptides [GO:0070011]	PF00004;PF07724;PF10431;	0.203333	80.4905
Kinesin-13, putative (Kinesin-like protein, putative)	Q8I4Y0	PF3D7_1245100 PFL2165w	kinesin complex [GO:0005871]; ATP binding [GO:0005524]; ATPase activity [GO:0016887]; microtubule binding [GO:0008017]; microtubule motor activity [GO:0003777]; motor activity [GO:0003774]; microtubule-based movement [GO:0007018]	PF00225;	0.17027	78.7068
Cation transporting P-ATPase (EC 3.6.3.12)	Q8I461	PF3D7_0504000	integral component of plasma membrane [GO:0005887]; intracellular membrane-bounded organelle [GO:0043231]; ATPase activity, coupled to transmembrane movement of ions, phosphorylative mechanism [GO:0015662]; calcium-transporting ATPase activity [GO:0005388]; nucleotide binding [GO:0000166]; potassium-transporting ATPase activity [GO:0008556]; cation transport [GO:0006812]		0.145345	80.809
ABC transporter B family member 6, putative	Q8IDH9	PF3D7_1352100	integral component of membrane [GO:0016021]; membrane [GO:0016020]; ATP binding [GO:0005524]; ATPase activity, coupled to transmembrane movement of substances [GO:0042626]; transport [GO:0006810]	PF00664;PF00005;	0.130068	83.0227
DNA (Cytosine-5)-methyltransferase (EC 2.1.1.37)	Q8IBI4	PF3D7_0727300	nucleus [GO:0005634]; DNA (cytosine-5-)-methyltransferase activity [GO:0003886]; DNA binding [GO:0003677]; DNA methylation [GO:0006306]		0.180031	82.6724
Sugar transporter, putative	Q8I2Z2	PF3D7_0916000	integral component of membrane [GO:0016021]; carbohydrate transport [GO:0008643]; transmembrane transport [GO:0055085]	PF07690;	0.127135	83.8668
Uncharacterized protein	C6KT00	PF3D7_0615900	catalytic activity [GO:0003824]		0.172957	84.3764
Nicotinamidase, putative (EC 3.5.1.19)	O97284	PF3D7_0320500	cytoplasm [GO:0005737]; nucleus [GO:0005634]; nicotinamidase activity [GO:0008936]; nicotinamide metabolic process [GO:0006769]	PF00857;	0.0938923	74.5023
Thioredoxin reductase 2 (TrxR2) (EC 1.8.1.9)	P61076	trxr2 PFI1170c	cytoplasm [GO:0005737]; mitochondrion [GO:0005739]; electron carrier activity [GO:0009055]; flavin adenine dinucleotide binding [GO:0050660]; thioredoxin-disulfide reductase activity [GO:0004791]; cell redox homeostasis [GO:0045454]; response to oxygen radical [GO:0000305]	PF07992;PF02852;	0.172864	79.4394
Tubulin--tyrosine ligase, putative (EC 6.3.2.25)	Q8IHP8	PF11_0481 PF3D7_1147200	tubulin-tyrosine ligase activity [GO:0004835]; protein polyglutamylation [GO:0018095]		0.153744	83.835
Chromatin assembly protein (ASF1), putative (Histone chaperone ASF1, putative)	Q8I5H2	PF3D7_1224500 PFL1180w	nucleus [GO:0005634]; chromatin binding [GO:0003682]; histone binding [GO:0042393]; unfolded protein binding [GO:0051082]; chromatin assembly [GO:0031497]; gene silencing [GO:0016458]; histone acetylation [GO:0016573]; nucleosome assembly [GO:0006334]; nucleosome disassembly [GO:0006337]	PF04729;	0.0873523	80.2516
High mobility group protein B3, putative	Q8I5Y7	PF3D7_1205800 PFL0290w	transcription factor TFIIIB complex [GO:0000126]; DNA binding [GO:0003677]; TFIIIB-type transcription factor activity [GO:0001026]; transcription from RNA polymerase III promoter [GO:0006383]		0.238524	77.1778
Uncharacterized protein	Q8I5G5	PF3D7_1225200 PFL1215c	nucleus [GO:0005634]; DNA binding [GO:0003677]	PF00249;	0.120502	76.5089
Uncharacterized protein	Q8IID3	PF11_0241 PF3D7_1123000	nucleus [GO:0005634]; DNA binding [GO:0003677]		0.0758146	75.7923
Uncharacterized protein	Q8I2L0	PF3D7_0930400.1	DNA binding [GO:0003677]; zinc ion binding [GO:0008270]	PF00249;PF05495;	0.110215	81.2071
Histone deacetylase (EC 3.5.1.98)	Q8IKB6	PF14_0690	histone deacetylase complex [GO:0000118]; integral component of membrane [GO:0016021]; histone deacetylase activity [GO:0004407]; NAD-dependent histone deacetylase activity (H3-K14 specific) [GO:0032041]; chromatin organization [GO:0006325]; regulation of transcription, DNA-templated [GO:0006355]; transcription, DNA-templated [GO:0006351]	PF00850;	0.265489	73.8971
AP-1 complex subunit gamma, putative (Gamma-adaptin, putative)	Q8IKS3	PF14_0529 PF3D7_1455500	clathrin adaptor complex [GO:0030131]; trans-Golgi network [GO:0005802]; protein transporter activity [GO:0008565]; intracellular protein transport [GO:0006886]; vesicle-mediated transport [GO:0016192]	PF01602;PF02883;	0.0927546	75.1393
Adaptor complexes medium subunit family	Q8IL63	PF14_0386 PF3D7_1440700	protein transport [GO:0015031]	PF00928;	0.164095	78.3723
AP-3 complex subunit beta, putative	C6KSX7	PF3D7_0613500	AP-3 adaptor complex [GO:0030123]; coated vesicle [GO:0030135]; intracellular protein transport [GO:0006886]; vesicle-mediated transport [GO:0016192]	PF01602;	0.178881	79.3119
U1 small nuclear ribonucleoprotein C (U1 snRNP C) (U1-C) (U1C)	Q8IAW3	PF08_0084	commitment complex [GO:0000243]; prespliceosome [GO:0071010]; U1 snRNP [GO:0005685]; pre-mRNA 5'-splice site binding [GO:0030627]; zinc ion binding [GO:0008270]; mRNA 5'-splice site recognition [GO:0000395]; spliceosomal snRNP assembly [GO:0000387]	PF06220;	0.0516823	77.5282
Protein transport protein SEC31 (Sec31p putative)	O96221	Sec31p PF3D7_0214100 PFB0640c	COPII vesicle coat [GO:0030127]; COPII-coated ER to Golgi transport vesicle [GO:0030134]; host cell cytoplasm [GO:0030430]; Maurer's cleft [GO:0020036]; ER to Golgi vesicle-mediated transport [GO:0006888]; translocation of peptides or proteins into host cell cytoplasm [GO:0044053]	PF12931;	0.117922	75.9038
Metacaspase-like protein	Q8ILT4	PF14_0160 PF3D7_1416200			0.13293	80.9205
Sentrin-specific protease 2, putative (EC 3.4.22.68)	C0H4Y4	PF3D7_0801700	cysteine-type peptidase activity [GO:0008234]; proteolysis [GO:0006508]		0.0526809	74.6934
Dipeptidyl aminopeptidase 3 (EC 3.4.14.4)	Q8I1Y2	PF3D7_0404700	extracellular space [GO:0005615]; lysosome [GO:0005764]; aminopeptidase activity [GO:0004177]; cysteine-type endopeptidase activity [GO:0004197]; cysteine-type peptidase activity [GO:0008234]; protein catabolic process [GO:0030163]; proteolysis involved in cellular protein catabolic process [GO:0051603]	PF08773;PF00112;	0.125999	80.2357
Uncharacterized protein	Q8IBT8	PF3D7_0716200	cytoplasm [GO:0005737]	PF04194;	0.154816	77.5919
GPI-anchored micronemal antigen	Q8IBB9	PF3D7_0828800	anchored component of plasma membrane [GO:0046658]; cytoplasm [GO:0005737]; extrinsic component of cell outer membrane [GO:0031244]; integral component of membrane [GO:0016021]; microneme [GO:0020009]; host cell surface binding [GO:0046812]		0.167461	78.3405
Probable inorganic pyrophosphatase (EC 3.6.1.1) (Pyrophosphate phospho-hydrolase) (PPase)	O77392	MAL3P6.3 PFC0710w	cytoplasm [GO:0005737]; inorganic diphosphatase activity [GO:0004427]; magnesium ion binding [GO:0000287]; phosphate-containing compound metabolic process [GO:0006796]	PF00719;	0.0549539	84.7427
Inorganic pyrophosphatase, putative (EC 3.6.1.1)	C0H477	PF3D7_0316300.2	cytoplasm [GO:0005737]; inorganic diphosphatase activity [GO:0004427]; magnesium ion binding [GO:0000287]; pyrophosphatase activity [GO:0016462]; phosphate-containing compound metabolic process [GO:0006796]	PF00719;	0.0549539	84.7427
Vacuolar protein sorting-associated protein 16,putative	Q8I524	PF3D7_1239900 PFL1935c	endosome [GO:0005768]; HOPS complex [GO:0030897]; lysosomal membrane [GO:0005765]; actin binding [GO:0003779]; endosomal transport [GO:0016197]; intracellular protein transport [GO:0006886]; regulation of SNARE complex assembly [GO:0035542]; regulation of vacuole fusion, non-autophagic [GO:0032889]; vacuole organization [GO:0007033]	PF04840;PF04841;	0.0905821	76.493
Polyadenylate-binding protein (PABP)	Q8I5H4	PF3D7_1224300 PFL1170w	cytoplasm [GO:0005737]; mRNA binding [GO:0003729]; poly(A) binding [GO:0008143]; RNA processing [GO:0006396]	PF00658;PF00076;	0.0609397	74.0723
Dynein light intermediate chain 2, cytosolic	Q8I385	PF3D7_0906400	cytoplasmic dynein complex [GO:0005868]; dynein heavy chain binding [GO:0045504]; microtubule motor activity [GO:0003777]; microtubule cytoskeleton organization [GO:0000226]; microtubule-based movement [GO:0007018]	PF05783;	0.0575804	79.8216
Ethanolamine-phosphate cytidylyltransferase (EC 2.7.7.14)	Q8IDM2	PF3D7_1347700	cytosol [GO:0005829]; ethanolamine-phosphate cytidylyltransferase activity [GO:0004306]; phospholipid biosynthetic process [GO:0008654]	PF01467;	0.111891	76.4293
Zinc finger protein, putative	O97273	PF3D7_0315800	cytosol [GO:0005829]; nucleus [GO:0005634]; nucleic acid binding [GO:0003676]; ubiquitin protein ligase activity [GO:0061630]; regulation of cell adhesion [GO:0030155]		0.196179	81.8283
Carbamoyl phosphate synthetase (EC 6.3.5.5)	Q8IEN3	PF3D7_1308200	cytoplasm [GO:0005737]; ATP binding [GO:0005524]; carbamoyl-phosphate synthase (ammonia) activity [GO:0004087]; carbamoyl-phosphate synthase (glutamine-hydrolyzing) activity [GO:0004088]; metal ion binding [GO:0046872]; 'de novo' pyrimidine nucleobase biosynthetic process [GO:0006207]; arginine biosynthetic process [GO:0006526]; glutamate catabolic process [GO:0006538]; urea cycle [GO:0000050]	PF02786;PF02787;PF00988;PF00117;PF02142;	0.0759137	74.7093
Cg1 protein	Q8IBZ8	PF3D7_0709100	DNA binding [GO:0003677]	PF08755;	0.136746	82.322
CCAAT-binding transcription factor, putative	Q8IL74	PF14_0374 PF3D7_1439500	CCAAT-binding factor complex [GO:0016602]; DNA binding [GO:0003677]; protein heterodimerization activity [GO:0046982]; transcription factor activity, sequence-specific DNA binding [GO:0003700]	PF00125;	0.270497	79.089
DNA polymerase epsilon catalytic subunit A,putative (EC 2.7.7.7)	C6KTD8	PF3D7_0630300	epsilon DNA polymerase complex [GO:0008622]; DNA binding [GO:0003677]; DNA-directed DNA polymerase activity [GO:0003887]; nucleotide binding [GO:0000166]; single-stranded DNA 3'-5' exodeoxyribonuclease activity [GO:0008310]; zinc ion binding [GO:0008270]; base-excision repair, gap-filling [GO:0006287]; DNA replication proofreading [GO:0045004]; DNA-dependent DNA replication [GO:0006261]; leading …	PF03104;	0.0930383	75.633
DNA-directed RNA polymerase subunit (EC 2.7.7.6)	Q8IE49	PF3D7_1329000	DNA-directed RNA polymerase III complex [GO:0005666]; DNA binding [GO:0003677]; DNA-directed 5'-3' RNA polymerase activity [GO:0003899]; transcription from RNA polymerase III promoter [GO:0006383]	PF04997;PF00623;PF04983;PF05000;PF04998;	0.114616	75.1393
Protein PF14_0175	Q8ILR9	PF14_0175	integral component of membrane [GO:0016021]; DNA binding [GO:0003677]		0.303704	80.2038
Zinc finger transcription factor (Krox1) (Zinc finger transcription factor, putative)	Q7KQK4	PF3D7_1209300 PFL0465c	nucleus [GO:0005634]; DNA binding [GO:0003677]; regulation of transcription, DNA-templated [GO:0006355]		0.149611	84.249
Uncharacterized protein	C6KSN4	PF3D7_0603600	integral component of membrane [GO:0016021]; nucleus [GO:0005634]; DNA binding [GO:0003677]	PF01388;	0.290288	77.8467
CCAAT-box DNA binding protein subunit B	Q8IHQ2	PF11_0477 PF3D7_1146600	nucleus [GO:0005634]; DNA binding [GO:0003677]; protein heterodimerization activity [GO:0046982]; regulation of transcription, DNA-templated [GO:0006355]	PF00808;	0.0848185	77.8945
AP2/ERF domain-containing protein PFD0985w (ApiAP2)	Q8I1N6	PFD0985w	nucleus [GO:0005634]; DNA binding [GO:0003677]; transcription factor activity, sequence-specific DNA binding [GO:0003700]; transcription, DNA-templated [GO:0006351]	PF00847;	0.19446	81.6849
Transcription factor with AP2 domain(S),putative	Q8I1Y8	PF3D7_0404100	DNA binding [GO:0003677]; transcription factor activity, sequence-specific DNA binding [GO:0003700]; regulation of transcription, DNA-templated [GO:0006355]	PF14733;PF00847;	0.132348	83.6598
ADP-ribosylation factor GTPase-activating protein (ADP-ribosylation factor GTPase-activating protein, putative)	Q8I4Y5	PF3D7_1244600 PFL2140c	DNA binding [GO:0003677]; GTPase activator activity [GO:0005096]; metal ion binding [GO:0046872]	PF01412;	0.11427	78.0538
Uncharacterized protein	Q8IJW2	PF10_0079 PF3D7_1008100	metal ion binding [GO:0046872]	PF00628;	0.274115	73.913
Uncharacterized protein	Q8IM41	PF14_0050 PF3D7_1405300			0.113296	82.4812
Replication protein A1, large subunit	Q9U0J0	PF3D7_0409600	nucleic acid binding [GO:0003676]; DNA replication [GO:0006260]; DNA-dependent DNA replication [GO:0006261]; regulation of DNA metabolic process [GO:0051052]	PF08646;PF16900;PF01336;	0.246674	74.3111
DNA-directed RNA polymerase III subunit RPC5,putative	Q8IKP3	PF14_0561 PF3D7_1458800	nucleus [GO:0005634]; DNA-directed 5'-3' RNA polymerase activity [GO:0003899]; transcription, DNA-templated [GO:0006351]	PF04801;	0.204789	86.1283
Mannosyltransferase (EC 2.4.1.-)	Q8IDS3	PF3D7_1341600	endoplasmic reticulum [GO:0005783]; endoplasmic reticulum membrane [GO:0005789]; integral component of membrane [GO:0016021]; dolichyl-phosphate-mannose-glycolipid alpha-mannosyltransferase activity [GO:0004584]; GPI anchor biosynthetic process [GO:0006506]	PF03901;	0.229071	82.8316
PRE-binding protein (QF122 antigen)	Q8IJS7	PF10_0115 PF3D7_1011800	nucleus [GO:0005634]; double-stranded DNA binding [GO:0003690]; RNA binding [GO:0003723]; transcription factor activity, sequence-specific DNA binding [GO:0003700]; regulation of transcription, DNA-templated [GO:0006355]	PF00013;	0.0516171	78.8979
Dynein heavy chain, putative	Q8I396	PF3D7_0905300	dynein complex [GO:0030286]; ATP binding [GO:0005524]; ATP-dependent microtubule motor activity, minus-end-directed [GO:0008569]; dynein intermediate chain binding [GO:0045505]; dynein light chain binding [GO:0045503]; dynein light intermediate chain binding [GO:0051959]; microtubule-based movement [GO:0007018]	PF12774;PF12780;PF12781;PF08393;PF03028;PF12777;	0.083262	82.4175
Dynein beta chain, putative	Q8IKH9	PF14_0626 PF3D7_1465800	dynein complex [GO:0030286]; ATP binding [GO:0005524]; ATP-dependent microtubule motor activity, minus-end-directed [GO:0008569]; dynein intermediate chain binding [GO:0045505]; dynein light chain binding [GO:0045503]; dynein light intermediate chain binding [GO:0051959]; microtubule-based movement [GO:0007018]	PF12774;PF03028;	0.167305	76.716
26S proteasome regulatory subunit RPN6 (Proteosome subunit, putative)	Q8IM66	PF14_0025 PF3D7_1402300	proteasome regulatory particle [GO:0005838]; proteasome regulatory particle, lid subcomplex [GO:0008541]; endopeptidase activity [GO:0004175]; structural molecule activity [GO:0005198]; proteasome assembly [GO:0043248]; proteolysis [GO:0006508]; ubiquitin-dependent protein catabolic process [GO:0006511]	PF01399;	0.107592	75.4419
Signal recognition particle subunit SRP68,putative	C6KT56	PF3D7_0621900	endoplasmic reticulum [GO:0005783]; signal recognition particle, endoplasmic reticulum targeting [GO:0005786]; 7S RNA binding [GO:0008312]; endoplasmic reticulum signal peptide binding [GO:0030942]; signal recognition particle binding [GO:0005047]; protein targeting to ER [GO:0045047]; SRP-dependent cotranslational protein targeting to membrane [GO:0006614]		0.137032	82.0035
RING finger protein PFE0100w	Q8I480	PFE0100w	endosome [GO:0005768]; HOPS complex [GO:0030897]; integral component of membrane [GO:0016021]; membrane [GO:0016020]; protein binding, bridging [GO:0030674]; zinc ion binding [GO:0008270]; endosome organization [GO:0007032]; intracellular protein transport [GO:0006886]; lysosome organization [GO:0007040]; regulation of SNARE complex assembly [GO:0035542]; vesicle docking involved in exocytosis [G…	PF12451;	0.0665695	84.3287
ER membrane protein complex subunit 1, putative	Q8IAU7	PF3D7_0811200	ER membrane protein complex [GO:0072546]; protein folding in endoplasmic reticulum [GO:0034975]	PF07774;	0.201964	85.4276
Initiation factor 2 subunit family, putative (Translation initiation factor eIF-2B subunit delta, putative)	Q8IJQ6	PF10_0136 PF3D7_1013900	cytoplasm [GO:0005737]; eukaryotic translation initiation factor 2B complex [GO:0005851]; translation initiation factor activity [GO:0003743]; translational initiation [GO:0006413]	PF01008;	0.0936395	75.8401
Exonuclease, putative	Q8IIU0	PF11_0074	exonuclease activity [GO:0004527]; nucleic acid binding [GO:0003676]; intein-mediated protein splicing [GO:0016539]	PF03159;	0.088947	77.6875
GTP-binding protein, putative	Q8I1U1	PF3D7_0414700	GTP binding [GO:0005525]	PF01926;	0.0606984	79.0571
NAD(P)H-dependent glutamate synthase, putative (EC 1.4.1.14)	Q8ILB1	PF14_0334 PF3D7_1435300	cytoplasm [GO:0005737]; glutamate synthase (NADH) activity [GO:0016040]; glutamate synthase activity [GO:0015930]; iron-sulfur cluster binding [GO:0051536]; ammonia assimilation cycle [GO:0019676]; glutamate biosynthetic process [GO:0006537]	PF14691;PF00310;PF04898;PF01645;PF01493;PF07992;	0.230398	73.7378
Alpha/beta hydrolase, putative (Conserved Plasmodium protein)	Q8II19	PF11_0356 PF3D7_1134500	integral component of membrane [GO:0016021]; hydrolase activity, acting on ester bonds [GO:0016788]	PF07819;	0.135842	82.6724
GTP-binding protein, putative	Q8IB77	PF3D7_0824300	GTP binding [GO:0005525]	PF01018;PF01926;	0.0818296	76.0949
Histone acetyltransferase GCN5 (EC 2.3.1.48)	Q8IB67	PF3D7_0823300	nucleus [GO:0005634]; H3 histone acetyltransferase activity [GO:0010484]; histone H3 acetylation [GO:0043966]; regulation of transcription, DNA-templated [GO:0006355]	PF00583;	0.238843	74.4704
Putative histone-lysine N-methyltransferase 1 (PfSET1) (EC 2.1.1.43)	C6KTD2	SET1 PFF1440w	histone-lysine N-methyltransferase activity [GO:0018024]; metal ion binding [GO:0046872]; protein domain specific binding [GO:0019904]; regulation of transcription, DNA-templated [GO:0006355]; transcription, DNA-templated [GO:0006351]		0.249721	79.296
Sodium/hydrogen exchanger, Na+, H+ antiporter	Q8IET0	PF3D7_1303500	integral component of membrane [GO:0016021]; plasma membrane [GO:0005886]; potassium:proton antiporter activity [GO:0015386]; sodium:proton antiporter activity [GO:0015385]; solute:proton antiporter activity [GO:0015299]; potassium ion transmembrane transport [GO:0071805]; regulation of intracellular pH [GO:0051453]; response to drug [GO:0042493]; sodium ion import across plasma membrane [GO:0098…	PF00999;	0.0975726	76.4612
mRNA-decapping enzyme 2, putative	Q8IEM5	PF3D7_1308900	cytoplasm [GO:0005737]; m7G(5')pppN diphosphatase activity [GO:0050072]; manganese ion binding [GO:0030145]; RNA binding [GO:0003723]; deadenylation-dependent decapping of nuclear-transcribed mRNA [GO:0000290]	PF05026;PF00293;	0.192423	82.959
NAD-dependent protein deacetylase Sir2B (EC 3.5.1.-) (Regulatory protein SIR2 homolog B) (SIR2-like protein B)	Q8IKW2	Sir2B PF14_0489	hydrolase activity [GO:0016787]; metal ion binding [GO:0046872]; NAD+ binding [GO:0070403]; regulation of transcription, DNA-templated [GO:0006355]	PF02146;	0.0938711	79.4712
Ubiquitin carboxyl-terminal hydrolase, putative (EC 3.4.19.12)	Q8IBN0	PF3D7_0722300	thiol-dependent ubiquitinyl hydrolase activity [GO:0036459]; zinc ion binding [GO:0008270]	PF02148;	0.0970074	80.5542
Inner membrane complex protein 1f, putative	Q8IDI3	PF3D7_1351700	inner membrane complex [GO:0070258]	PF12314;	0.237398	78.213
Inositol-phosphate phosphatase, putative (EC 3.1.3.25)	Q8IC15	PF3D7_0705500	inositol monophosphate 1-phosphatase activity [GO:0008934]; inositol monophosphate 3-phosphatase activity [GO:0052832]; inositol monophosphate 4-phosphatase activity [GO:0052833]; phosphatidylinositol dephosphorylation [GO:0046856]	PF02383;	0.0933693	74.6934
Histone deacetylase (EC 3.5.1.98)	Q8IJW3	PF10_0078 PF3D7_1008000	nucleus [GO:0005634]; inositol-1,4,5-trisphosphate 3-kinase activity [GO:0008440]; NAD-dependent histone deacetylase activity (H3-K14 specific) [GO:0032041]; regulation of gene expression [GO:0010468]; regulation of transcription, DNA-templated [GO:0006355]; transcription, DNA-templated [GO:0006351]	PF00850;PF03770;	0.0892511	79.0253
Protein Mpv17, putative	Q8I478	PF3D7_0502200	integral component of peroxisomal membrane [GO:0005779]	PF04117;	0.0516175	77.576
Uncharacterized protein PFL1135c	Q8I5I1	PFL1135c	integral component of membrane [GO:0016021]		0.134664	81.0001
Conserved Plasmodium membrane protein (Serpentine receptor, putative)	Q8I5P8	SR10 PF3D7_1215900 PFL0765w	integral component of membrane [GO:0016021]	PF06814;	0.0616499	83.8668
Uncharacterized protein PF11_0213	Q8IIG1	PF11_0213	integral component of membrane [GO:0016021]		0.109775	76.9549
Protein YIPF	Q8IKB7	PF14_0689 PF3D7_1472100	integral component of membrane [GO:0016021]	PF04893;	0.0667673	79.7897
Putative E3 ubiquitin-protein ligase protein PFF1365c (EC 2.3.2.26) (HECT-type E3 ubiquitin transferase PFF1365c)	C6KTB7	PFF1365c	cytoplasm [GO:0005737]; integral component of membrane [GO:0016021]; ubiquitin protein ligase activity [GO:0061630]	PF12796;	0.151813	75.7604
Protein dopey homolog PFC0245c	O97239	PFC0245c	integral component of membrane [GO:0016021]; membrane [GO:0016020]; peroxisome [GO:0005777]; protein transport [GO:0015031]	PF04118;	0.201726	76.3975
Putative zinc carboxypeptidase PFA0170c (EC 3.4.17.-)	Q8I2A6	PFA0170c	integral component of membrane [GO:0016021]; carboxypeptidase activity [GO:0004180]; metal ion binding [GO:0046872]; metallopeptidase activity [GO:0008237]		0.190916	73.8174
Mitochondrial inner membrane protein OXA1,putative	Q8IBB5	PF3D7_0828400	integral component of membrane [GO:0016021]; protein insertion into membrane [GO:0051205]	PF02096;	0.189411	85.1409
Mitochondrial carrier protein, putative	Q8IAU6	PF3D7_0811100	integral component of membrane [GO:0016021]; mitochondrial inner membrane [GO:0005743]; FAD transmembrane transporter activity [GO:0015230]; folic acid transporter activity [GO:0008517]; mitochondrial transport [GO:0006839]	PF00153;	0.152882	82.9909
Uncharacterized protein	Q8IEN8	PF3D7_1307700	intracellular [GO:0005622]; intracellular protein transport [GO:0006886]		0.199201	82.0194
Uncharacterized protein	Q8ILE0	PF14_0304 PF3D7_1432300	cytosol [GO:0005829]; integral component of membrane [GO:0016021]; nuclear envelope [GO:0005635]; protein transporter activity [GO:0008565]; Ran GTPase binding [GO:0008536]; transcription factor import into nucleus [GO:0042991]	PF03810;	0.0890956	85.7302
AP-3 complex subunit delta, putative	C0H4T0	PF3D7_0808100	AP-3 adaptor complex [GO:0030123]; integral component of membrane [GO:0016021]; protein transport [GO:0015031]		0.189563	75.1552
Vacuolar protein sorting-associated protein 45,putative (Vacuolar protein-sorting protein VPS45, putative)	O96243	PF3D7_0216400 PFB0750w	intracellular [GO:0005622]; intracellular protein transport [GO:0006886]; vesicle docking involved in exocytosis [GO:0006904]	PF00995;	0.155291	78.1016
Atypical protein kinase, ABC-1 family, putative	Q8ILV0	ABCk2 PF14_0143	kinase activity [GO:0016301]	PF03109;	0.170147	80.0764
Phosphatidylinositol 3-and 4-kinase, putative (EC 2.7.1.137) (EC 2.7.1.67)	O77353	PF3D7_0311300	1-phosphatidylinositol 4-kinase activity [GO:0004430]; 1-phosphatidylinositol-3-kinase activity [GO:0016303]	PF00454;	0.0662377	76.9708
E3 ubiquitin-protein ligase, putative	Q8IB94	PF3D7_0826100	cytoplasm [GO:0005737]; integral component of membrane [GO:0016021]; ligase activity [GO:0016874]; ubiquitin protein ligase activity [GO:0061630]; ubiquitin-protein transferase activity [GO:0004842]; ubiquitin-dependent protein catabolic process [GO:0006511]	PF14377;PF00632;	0.241396	84.2013
Ubiquitin-protein ligase, putative	Q8IIH3	PF11_0201 PF3D7_1119400	cytoplasm [GO:0005737]; integral component of membrane [GO:0016021]; ligase activity [GO:0016874]; ubiquitin protein ligase activity [GO:0061630]	PF00632;	0.195516	76.2064
Lysine decarboxylase, putative (EC 4.1.1.18)	Q8I1X1	PF3D7_0405700	lysine decarboxylase activity [GO:0008923]; lysine catabolic process [GO:0006554]	PF01276;PF03711;	0.161832	82.6883
Uncharacterized protein	Q8IJD3	PF10_0265 PF3D7_1027000	SAGA complex [GO:0000124]; transcription cofactor activity [GO:0003712]		0.100388	84.472
MtN3-like protein	O96245	PF3D7_0216600 PFB0760w	integral component of membrane [GO:0016021]; membrane [GO:0016020]; sugar transmembrane transporter activity [GO:0051119]; carbohydrate transport [GO:0008643]	PF03083;	0.127348	79.0253
Parasite-infected erythrocyte surface protein	Q8I2A1	PF3D7_0103900	integral component of membrane [GO:0016021]	PF03388;	0.0784657	81.3186
U3 small nucleolar RNA-associated protein 4,putative	Q8IDZ2	PF3D7_1333600	integral component of membrane [GO:0016021]; membrane [GO:0016020]		0.0884431	76.286
Uncharacterized protein	Q8IE71	PF3D7_1324600	integral component of membrane [GO:0016021]; membrane [GO:0016020]		0.0876903	78.7227
Mechanosensitive ion channel protein	Q8IIS3	PF11_0092 PF3D7_1107900	integral component of membrane [GO:0016021]; plasma membrane [GO:0005886]; mechanically-gated ion channel activity [GO:0008381]; anion transport [GO:0006820]	PF00924;	0.0822789	74.2793
Uncharacterized protein	C0H487	PF3D7_0403400	integral component of membrane [GO:0016021]; nucleic acid binding [GO:0003676]	PF04182;	0.206371	84.7427
Zinc finger protein, putative	C0H566	PF3D7_0927200	metal ion binding [GO:0046872]	PF00642;	0.284822	76.8275
Uncharacterized protein	C6KSM0	PF3D7_0602000	metal ion binding [GO:0046872]		0.120701	76.0949
Zinc finger protein, putative	Q8I3N4	PF3D7_0522900	metal ion binding [GO:0046872]		0.211463	81.2549
Uncharacterized protein	Q8I5X3	PF3D7_1207200 PFL0360c	integral component of membrane [GO:0016021]; metal ion binding [GO:0046872]		0.144228	81.7486
Zinc finger protein, putative	Q8IDB9	PF3D7_1358600	metal ion binding [GO:0046872]		0.182474	74.7571
Zinc finger C-x8-C-x5-C-x3-H type, putative	Q8IJK9	PF10_0186	metal ion binding [GO:0046872]	PF00642;	0.0891594	79.8534
Zinc finger C-x8-C-x5-C-x3-H type, putative	Q8IJV8	PF10_0083 PF3D7_1008600	metal ion binding [GO:0046872]	PF00642;	0.100535	78.7864
Nuclear polyadenylated RNA-binding protein NAB2,putative	C6KT67	PF3D7_0623100	cytoplasm [GO:0005737]; nucleus [GO:0005634]; metal ion binding [GO:0046872]; poly(A) binding [GO:0008143]; negative regulation of mRNA polyadenylation [GO:1900364]; regulation of mRNA stability [GO:0043488]		0.167461	75.2508
Pre-mRNA-splicing factor CWC2, putative	Q8I3V8	PF3D7_0515000	Prp19 complex [GO:0000974]; U2-type catalytic step 1 spliceosome [GO:0071006]; U2-type catalytic step 2 spliceosome [GO:0071007]; metal ion binding [GO:0046872]; pre-mRNA binding [GO:0036002]; U6 snRNA binding [GO:0017070]; spliceosomal snRNP assembly [GO:0000387]	PF00076;PF16131;	0.22058	76.9549
Conserved Plasmodium protein	C6S3B8	PF3D7_0218200 PFB0850c	rRNA (guanine-N1-)-methyltransferase activity [GO:0008989]; ribosomal large subunit assembly [GO:0000027]	PF12752;	0.166644	83.3412
Bicoid-interacting protein BIN3, putative	Q8IHR1	PF11_0468 PF3D7_1145700	methyltransferase activity [GO:0008168]	PF06859;	0.1196	77.783
tRNA m5C-methyltransferase, putative (EC 2.1.1.-)	Q8IIQ2	PF11_0116 PF3D7_1111000	mitochondrial large ribosomal subunit [GO:0005762]; methyltransferase activity [GO:0008168]; RNA binding [GO:0003723]; rRNA methylation [GO:0031167]	PF01189;	0.0618182	79.8057
mRNA methyltransferase, putative (EC 2.1.1.62)	Q8I567	PF3D7_1235500 PFL1715w	mRNA (2'-O-methyladenosine-N6-)-methyltransferase activity [GO:0016422]; nucleic acid binding [GO:0003676]	PF05063;	0.144569	73.8015
Spindle pole body protein, putative	O97225	PF3D7_0303500	centrosome [GO:0005813]; equatorial microtubule organizing center [GO:0000923]; gamma-tubulin small complex [GO:0008275]; spindle pole [GO:0000922]; gamma-tubulin binding [GO:0043015]; structural constituent of cytoskeleton [GO:0005200]; centrosome duplication [GO:0051298]; cytoplasmic microtubule organization [GO:0031122]; interphase microtubule nucleation by interphase microtubule organizing ce…	PF04130;	0.101409	77.6078
Uncharacterized protein	Q8IL35	PF14_0414 PF3D7_1443600	centrosome [GO:0005813]; equatorial microtubule organizing center [GO:0000923]; gamma-tubulin ring complex [GO:0008274]; spindle pole [GO:0000922]; gamma-tubulin binding [GO:0043015]; structural constituent of cytoskeleton [GO:0005200]; centrosome duplication [GO:0051298]; cytoplasmic microtubule organization [GO:0031122]; interphase microtubule nucleation by interphase microtubule organizing cen…	PF04130;	0.200042	80.8727
mRNA (N6-adenosine)-methyltransferase, putative (EC 2.1.1.62)	Q8I6Z2	PF3D7_0729500	nuclear speck [GO:0016607]; RNA N6-methyladenosine methyltransferase complex [GO:0036396]; mRNA (2'-O-methyladenosine-N6-)-methyltransferase activity [GO:0016422]; RNA methylation [GO:0001510]; RNA modification [GO:0009451]	PF05063;	0.117842	75.9675
RNA-binding protein 25, putative	C6KSU9	PF3D7_0610200	RNA binding [GO:0003723]; mRNA processing [GO:0006397]	PF01480;PF00076;	0.101035	78.9775
U4/U6 small nuclear ribonucleoprotein PRP3,putative	Q8IEM1	PF3D7_1309300	U4/U6 x U5 tri-snRNP complex [GO:0046540]; viral nucleocapsid [GO:0019013]; mRNA splicing, via spliceosome [GO:0000398]	PF06544;PF08572;	0.0588121	74.8049
Conserved Plasmodium protein	O96201	PF3D7_0212100 PFB0540w	nuclear periphery [GO:0034399]; nucleus [GO:0005634]		0.308661	79.7419
Lysine-specific histone demethylase 1, putative (EC 1.14.11.27)	Q8I5T5	PF3D7_1211600 PFL0575w	nuclear periphery [GO:0034399]; histone demethylase activity (H3-K36 specific) [GO:0051864]; metal ion binding [GO:0046872]; methyltransferase activity [GO:0008168]	PF01593;	0.181546	76.493
Transcription factor with AP2 domain(S)	C6KSN9	PF3D7_0604100	nuclear periphery [GO:0034399]; telomeric DNA binding [GO:0042162]		0.190083	76.6682
Nucleoporin NUP100/NSP100, putative	Q8I398	PF3D7_0905100	integral component of membrane [GO:0016021]; nuclear pore [GO:0005643]; nucleus [GO:0005634]	PF13634;	0.0986078	73.8493
Transportin	C6KTB3	PF3D7_0627700	cytoplasm [GO:0005737]; nuclear membrane [GO:0031965]; nuclear periphery [GO:0034399]; nuclear pore [GO:0005643]; nuclear localization sequence binding [GO:0008139]; protein transmembrane transporter activity [GO:0008320]; protein transporter activity [GO:0008565]; Ran GTPase binding [GO:0008536]; NLS-bearing protein import into nucleus [GO:0006607]; protein import into nucleus [GO:0006606]; prot…	PF03810;	0.142527	77.1938
Uncharacterized protein	Q8I3F4	PF3D7_0531400	U2-type post-mRNA release spliceosomal complex [GO:0071008]; nucleic acid binding [GO:0003676]; spliceosomal complex disassembly [GO:0000390]	PF01585;	0.096434	85.5072
Uncharacterized protein	Q8IBH8	PF3D7_0727900	integral component of membrane [GO:0016021]; nucleic acid binding [GO:0003676]		0.310911	85.3002
mRNA processing protein, putative	Q8I0W1	PF3D7_0933000	RNA binding [GO:0003723]	PF14327;PF15861;PF00076;	0.0558491	80.9205
Uncharacterized protein	Q8IBL4	PF3D7_0723900	RNA binding [GO:0003723]	PF00076;	0.0644882	81.9079
RNA-binding protein, putative	Q8IE57	PF3D7_1326300	commitment complex [GO:0000243]; nuclear speck [GO:0016607]; U2-type prespliceosome [GO:0071004]; U2AF [GO:0089701]; poly-pyrimidine tract binding [GO:0008187]; pre-mRNA 3'-splice site binding [GO:0030628]		0.109157	76.7001
RNA-binding protein, putative	Q8IHX4	PF11_0402 PF3D7_1139100	RNA binding [GO:0003723]	PF00076;	0.194337	78.3405
RNA-binding protein, putative	Q8IJI3	PF10_0214 PF3D7_1022000	RNA binding [GO:0003723]	PF00076;	0.0823666	81.0957
Erythrocyte membrane-like protein (RNA-binding protein, putative)	Q8IL17	PF14_0433 PF3D7_1445600	nucleus [GO:0005634]; RNA binding [GO:0003723]	PF00076;PF07744;	0.0551974	73.8174
CCR4-NOT transcription complex subunit 4,putative	Q8I569	PF3D7_1235300 PFL1705w	CCR4-NOT complex [GO:0030014]; RNA binding [GO:0003723]; ubiquitin-protein transferase activity [GO:0004842]; nuclear-transcribed mRNA catabolic process, deadenylation-dependent decay [GO:0000288]		0.125479	85.2683
CCR4-associated factor 1	C0H4T9	PF3D7_0811300	CCR4-NOT core complex [GO:0030015]; P-body [GO:0000932]; nucleic acid binding [GO:0003676]; poly(A)-specific ribonuclease activity [GO:0004535]; exonucleolytic nuclear-transcribed mRNA catabolic process involved in deadenylation-dependent decay [GO:0043928]; negative regulation of translation [GO:0017148]		0.201542	83.6438
RNA-binding protein, putative	Q8I515	PF3D7_1241400 PFL1990c	RNA binding [GO:0003723]		0.172911	81.3664
Uncharacterized protein	Q8ILV4	PF14_0139 PF3D7_1414100	nucleic acid binding [GO:0003676]; zinc ion binding [GO:0008270]	PF13696;	0.103232	81.8283
Telomerase reverse transcriptase (EC 2.7.7.49)	Q8IEH2	PF3D7_1314200	nucleolus [GO:0005730]; telomerase catalytic core complex [GO:0000333]; telomerase RNA binding [GO:0070034]; telomerase RNA reverse transcriptase activity [GO:0003721]; telomeric DNA binding [GO:0042162]; telomere formation via telomerase [GO:0032203]; telomere maintenance via telomerase [GO:0007004]	PF12009;	0.10089	77.0823
COBW domain-containing protein 1, putative	Q8IM39	PF14_0052 PF3D7_1405500		PF02492;	0.0977346	79.8534
Uncharacterized protein	O77316	PF3D7_0302800	nucleus [GO:0005634]; RNA binding [GO:0003723]		0.102002	80.4427
RNA-binding protein mei2 homologue, putative	C6KT70	PF3D7_0623400	RNA binding [GO:0003723]; positive regulation of meiotic nuclear division [GO:0045836]	PF04059;	0.165168	78.8979
RNA-binding protein, putative	C6KSQ9	PF3D7_0606100	NELF complex [GO:0032021]; RNA binding [GO:0003723]; regulation of transcription, DNA-templated [GO:0006355]	PF00076;	0.106456	77.576
RNA-binding protein, putative	C6KTC9	PF3D7_0629400	RNA binding [GO:0003723]	PF00076;	0.193225	76.2382
RNA-binding protein, putative	Q8I1S7	PF3D7_0416000	RNA binding [GO:0003723]	PF00076;	0.11662	80.1879
Clustered-asparagine-rich protein	Q8I562	PF3D7_1236100 PFL1745c	RNA binding [GO:0003723]	PF00076;PF00397;	0.168877	75.8241
Bromodomain protein 2, putative (Bromodomain protein, putative)	Q8I5S4	PF3D7_1212900 PFL0635c	nucleus [GO:0005634]	PF00439;	0.0663921	76.3656
Uncharacterized protein MAL13P1.304	Q8ID94	MAL13P1.304	nucleus [GO:0005634]		0.174022	79.7579
Chloroquine resistance marker protein	Q8IKY8	PF14_0463 PF3D7_1448500	DNA binding [GO:0003677]; DNA-templated transcription, initiation [GO:0006352]	PF12047;	0.0827513	79.9968
Sporozoite and liver stage asparagine-rich protein	Q8IHP9	PF11_0480 PF3D7_1147000	nucleus [GO:0005634]; regulation of gene expression [GO:0010468]		0.273657	81.876
Transcription factor with AP2 domain(S)	Q8I5I9	PF3D7_1222600 PFL1085w	nucleus [GO:0005634]; transcription factor activity, sequence-specific DNA binding [GO:0003700]	PF00847;	0.188712	82.8794
Uncharacterized protein	C0H4R0	PF3D7_0801900	oxidoreductase activity [GO:0016491]	PF01593;	0.235333	78.7068
Peptidase family C50, putative (EC 3.4.22.49)	C0H4T3	PF3D7_0809600	integral component of membrane [GO:0016021]; nucleus [GO:0005634]; peptidase activity [GO:0008233]		0.160553	85.762
Phosphoinositide-binding protein, putative	Q8IBP4	PF3D7_0720700	early endosome [GO:0005769]; integral component of membrane [GO:0016021]; phosphatidylinositol binding [GO:0035091]; intracellular protein transport [GO:0006886]; retrograde transport, endosome to plasma membrane [GO:1990126]	PF00787;	0.221814	79.949
Plasmodium falciparum 3D7 chromosome 13	Q8ID99	protein sumoylation [GO:0016925]; SUMO transferase activity [GO:0019789]			0.101053	77.7671
Uncharacterized protein	Q8IM68	PF14_0023 PF3D7_1402100	integral component of membrane [GO:0016021]; pseudouridine synthase activity [GO:0009982]; RNA binding [GO:0003723]; tRNA pseudouridine synthesis [GO:0031119]		0.113662	76.5408
mRNA-binding protein PUF1	Q8I3S3	PF3D7_0518700	RNA binding [GO:0003723]; regulation of RNA stability [GO:0043487]; regulation of translation [GO:0006417]	PF00806;	0.230467	76.3178
Ribonuclease, putative (EC 3.1.13.1)	C6KSZ5	PF3D7_0615400	exosome (RNase complex) [GO:0000178]; P-body [GO:0000932]; 3'-5'-exoribonuclease activity [GO:0000175]; exoribonuclease II activity [GO:0008859]; ribonuclease activity [GO:0004540]; RNA catabolic process [GO:0006401]; RNA processing [GO:0006396]; rRNA processing [GO:0006364]		0.0926804	76.7956
Eukaryotic translation initation factor 4 gamma	C0H5B1	PF3D7_1312900	RNA binding [GO:0003723]		0.167901	74.2952
RNA-binding protein, putative	C6KSP9	PF3D7_0605100	RNA binding [GO:0003723]	PF00013;	0.138844	77.1778
Uncharacterized protein	Q8I403	PF3D7_0510100	nucleus [GO:0005634]; RNA binding [GO:0003723]		0.155875	75.2986
Polyadenylate-binding protein-interacting protein 1, putative	Q8IIS9	PF11_0086 PF3D7_1107300	RNA binding [GO:0003723]		0.204033	78.8501
rRNA (Adenosine-2'-O-)-methyltransferase, putative (rRNA (Adenosine-2'-O-)-methyltransferase,putative) (EC 2.1.1.230)	Q8ILH0	PF14_0273 PF3D7_1429400	RNA binding [GO:0003723]; rRNA (guanosine-2'-O-)-methyltransferase activity [GO:0070039]; tRNA (guanine) methyltransferase activity [GO:0016423]; enzyme-directed rRNA 2'-O-methylation [GO:0000453]; tRNA methylation [GO:0030488]	PF00588;	0.22348	83.2457
Transcription or splicing factor-like protein,putative	C6KT72	PF3D7_0623600	pre-mRNA branch point binding [GO:0045131]; RNA binding [GO:0003723]; zinc ion binding [GO:0008270]; mRNA splicing, via spliceosome [GO:0000398]; RNA splicing [GO:0008380]; RNA splicing, via transesterification reactions [GO:0000375]	PF00013;PF16275;	0.0506317	80.4586
WW domain-binding protein 11, putative	Q8ILI4	PF14_0259 PF3D7_1428100	RNA processing [GO:0006396]	PF09429;	0.14979	87.1794
Transcription factor with AP2 domain(S) (Transcription factor with AP2 domain(S), putative)	Q8IKH2	ApiAP2 PF14_0633 PF3D7_1466400	sequence-specific DNA binding [GO:0043565]; transcription factor activity, sequence-specific DNA binding [GO:0003700]	PF00847;	0.100467	75.8719
Transcription factor with AP2 domain(S)	C0H5G5	PF3D7_1342900	transcription factor activity, sequence-specific DNA binding [GO:0003700]	PF00847;	0.258484	79.3119
Transcription factor with AP2 domain(S)	C6KSY0	PF3D7_0613800	DNA binding [GO:0003677]; transcription factor activity, sequence-specific DNA binding [GO:0003700]; DNA-templated transcription, initiation [GO:0006352]	PF00847;	0.107908	77.4008
Transcription factor with AP2 domain(S)	Q8I5J1	PF3D7_1222400 PFL1075w	transcription factor activity, sequence-specific DNA binding [GO:0003700]	PF00847;	0.202398	79.0571
Transcription factor with AP2 domain(S)	Q8IAM1	PF3D7_0802100	transcription factor activity, sequence-specific DNA binding [GO:0003700]	PF00847;	0.215328	82.0831
Transcription factor with AP2 domain(S)	Q8IBF6	PF3D7_0730300	transcription factor activity, sequence-specific DNA binding [GO:0003700]	PF14733;PF00847;	0.113368	78.0538
Transcription factor with AP2 domain(S)	Q8IHT5	PF11_0442 PF3D7_1143100	transcription factor activity, sequence-specific DNA binding [GO:0003700]	PF00847;	0.271942	78.9616
Malaria antigen (Transcription factor with AP2 domain(S))	Q8IHX2	PF11_0404 PF3D7_1139300	transcription factor activity, sequence-specific DNA binding [GO:0003700]	PF14733;PF00847;	0.236549	79.8216
Uncharacterized protein	Q8IIH0	PF11_0204 PF3D7_1119700	transcription factor activity, sequence-specific DNA binding [GO:0003700]	PF02045;	0.149307	78.9616
Transcription factor with AP2 domain(S) (Transcription factor with AP2 domain(S), putative)	Q8IKR9	ApiAP2 PF14_0533 PF3D7_1456000	transcription factor activity, sequence-specific DNA binding [GO:0003700]	PF00847;	0.0718413	78.9138
Transcription factor with AP2 domain(S), putative (Transcription factor with AP2 domain(S),putative)	Q8IKY0	ApiAP2 PF14_0471 PF3D7_1449500	transcription factor activity, sequence-specific DNA binding [GO:0003700]	PF14733;PF00847;	0.186412	80.7931
Uncharacterized protein	C0H4S9	PF3D7_0808000	cytoplasm [GO:0005737]		0.166026	83.1661
Signal recognition particle subunit SRP72,putative	Q8II00	PF11_0375 PF3D7_1136400	signal recognition particle, endoplasmic reticulum targeting [GO:0005786]; signal sequence binding [GO:0005048]; SRP-dependent cotranslational protein targeting to membrane, translocation [GO:0006616]		0.14809	80.3153
Uncharacterized protein	Q8II85	PF11_0289 PF3D7_1127800	transcription, DNA-templated [GO:0006351]	PF07500;	0.136537	74.9163
Uncharacterized protein	C0H517	PF3D7_0903300	integral component of membrane [GO:0016021]		0.252379	76.9549
Uncharacterized protein	Q8IES7	PF3D7_1303800	integral component of membrane [GO:0016021]; kinase activity [GO:0016301]; microtubule motor activity [GO:0003777]; microtubule-based movement [GO:0007018]		0.324623	89.8709
Uncharacterized protein	Q8IE92	PF3D7_1322300			0.136109	81.2231
Cytoplasmic tRNA 2-thiolation protein 2,putative	Q8IL60	PF14_0389 PF3D7_1441000	cytosol [GO:0005829]; sulfurtransferase activity [GO:0016783]; tRNA wobble position uridine thiolation [GO:0002143]		0.120863	80.156
Ubiquitin specific protease, putative	Q8I3A3	PF3D7_0904600	thiol-dependent ubiquitin-specific protease activity [GO:0004843]; protein deubiquitination [GO:0016579]; ubiquitin-dependent protein catabolic process [GO:0006511]	PF06337;PF00443;	0.0932297	79.6782
Uncharacterized protein	C0H5H1	PF3D7_1344300	zinc ion binding [GO:0008270]	PF00498;PF12906;	0.117455	77.576
Phd finger protein, putative	O77336	PF3D7_0310200	integral component of membrane [GO:0016021]; mitochondrion [GO:0005739]; ATP-dependent peptidase activity [GO:0004176]; metal ion binding [GO:0046872]; metallopeptidase activity [GO:0008237]; proteolysis [GO:0006508]		0.176032	81.6531
FHA domain protein, putative	Q8I355	PF3D7_0909700	zinc ion binding [GO:0008270]	PF00498;PF12906;	0.136351	74.98
Zinc finger protein, putative	Q8I5W0	PF3D7_1208800 PFL0440c	integral component of membrane [GO:0016021]; membrane raft [GO:0045121]; plasma membrane [GO:0005886]; SH3 domain binding [GO:0017124]; ubiquitin protein ligase activity [GO:0061630]; proteolysis [GO:0006508]; regulation of signaling [GO:0023051]; signal transduction [GO:0007165]		0.10227	80.2516
Zinc finger protein, putative	Q8I5Z0	PF3D7_1205500 PFL0275w			0.184456	77.6556
GTPase-activating protein, putative	Q8IAP4	PF3D7_0804900	GTPase activator activity [GO:0005096]; metal ion binding [GO:0046872]	PF01412;	0.090272	74.98
Zinc finger, C3HC4 type, putative	Q8IBH2	PF3D7_0728600	metal ion binding [GO:0046872]	PF13445;	0.20395	81.5734
Vacuolar protein sorting-associated protein 18,putative	Q8IEL8	PF3D7_1309700	endosome [GO:0005768]; HOPS complex [GO:0030897]; protein binding, bridging [GO:0030674]; endosome organization [GO:0007032]; lysosome organization [GO:0007040]; regulation of SNARE complex assembly [GO:0035542]; vesicle docking involved in exocytosis [GO:0006904]	PF05131;	0.0988867	81.7646
RING zinc finger protein, putative	Q8IID0	PF11_0244 PF3D7_1123300	integral component of membrane [GO:0016021]; intracellular [GO:0005622]; ubiquitin conjugating enzyme binding [GO:0031624]; ubiquitin protein ligase activity [GO:0061630]; positive regulation of proteasomal ubiquitin-dependent protein catabolic process [GO:0032436]; protein polyubiquitination [GO:0000209]		0.0818488	74.6137
Zinc finger protein, putative	Q8IKX2	PF14_0479 PF3D7_1450400			0.132379	86.3194
Zinc finger protein, putative	Q8ILP7	PF14_0197 PF3D7_1420300	mitochondrion [GO:0005739]; chaperone binding [GO:0051087]; zinc ion binding [GO:0008270]; protein folding [GO:0006457]; protein import into mitochondrial matrix [GO:0030150]; protein stabilization [GO:0050821]	PF05180;	0.0822175	75.6808
Reticulocyte binding protein homologue 1	B9ZSJ4	PF3D7_0402300	integral component of membrane [GO:0016021]		0.0595656	83.389
Uncharacterized protein	C0H488	PF3D7_0403600			0.11797	77.9264
Uncharacterized protein	C0H4B2	PF3D7_0417700			0.0834875	81.892
Uncharacterized protein	C0H4C9	PF3D7_0506500			0.155351	74.2634
Plasmodium falciparum 3D7 chromosome 5	C0H4G7				0.0560398	76.5408
Uncharacterized protein	C0H4K3	PF3D7_0704000	integral component of membrane [GO:0016021]		0.127046	82.8157
Uncharacterized protein	C0H4K4	PF3D7_0704100	integral component of membrane [GO:0016021]		0.0640717	74.5341
Uncharacterized protein	C0H4M8	PF3D7_0713900			0.139022	80.7453
Uncharacterized protein	C0H4P2	PF3D7_0724700			0.0795364	79.1686
Uncharacterized protein	C0H4P4	PF3D7_0726400	integral component of membrane [GO:0016021]		0.168234	84.7268
Uncharacterized protein	C0H4R6	PF3D7_0805500			0.183045	86.9724
Plasmodium falciparum 3D7 chromosome 8	C0H4S4				0.171289	87.705
Uncharacterized protein	C0H4T4	PF3D7_0809800	integral component of membrane [GO:0016021]		0.0537217	84.9816
Phosphatase, putative	C0H4V3	PF3D7_0817400		PF08645;	0.114187	83.0705
Uncharacterized protein	C0H4W8	PF3D7_0822200	integral component of membrane [GO:0016021]	PF12237;	0.173345	85.9372
DnaJ protein, putative	C0H4Z5	PF3D7_0831200	integral component of membrane [GO:0016021]	PF00226;PF14308;PF09687;	0.108017	75.6967
Exoribonuclease II	C0H520	PF3D7_0906000	exosome (RNase complex) [GO:0000178]; nuclear periphery [GO:0034399]; nucleus [GO:0005634]; P-body [GO:0000932]; 3'-5'-exoribonuclease activity [GO:0000175]; posttranscriptional gene silencing [GO:0016441]; RNA catabolic process [GO:0006401]; rRNA processing [GO:0006364]		0.0691089	78.1653
Uncharacterized protein	C0H528	PF3D7_0909100	integral component of membrane [GO:0016021]		0.0889032	81.9875
Ran-binding protein, putative	C0H530	PF3D7_0910100	cytoplasm [GO:0005737]; nuclear pore [GO:0005643]; nuclear export signal receptor activity [GO:0005049]; Ran GTPase binding [GO:0008536]; protein export from nucleus [GO:0006611]		0.0965022	76.7478
Uncharacterized protein	C0H5A6	PF3D7_1308400	integral component of membrane [GO:0016021]		0.153804	77.1778
Uncharacterized protein	C0H5A7	PF3D7_1308600			0.125797	78.7545
Uncharacterized protein	C0H5B3	PF3D7_1313800	integral component of membrane [GO:0016021]; microtubule motor activity [GO:0003777]; microtubule-based movement [GO:0007018]		0.121039	78.3245
Uncharacterized protein	C0H5D1	PF3D7_1322700			0.0812591	79.4394
Uncharacterized protein	C0H5E2	PF3D7_1326900	integral component of membrane [GO:0016021]		0.103169	80.6657
Uncharacterized protein	C0H5E3	PF3D7_1327000	integral component of membrane [GO:0016021]	PF15140;	0.221692	77.5601
Uncharacterized protein	C0H5E8	PF3D7_1329900			0.107705	81.9079
Uncharacterized protein	C0H5F7	PF3D7_1337500			0.289594	80.2038
Uncharacterized protein	C0H5I1	PF3D7_1351900	mitochondrion [GO:0005739]; ATP-dependent peptidase activity [GO:0004176]; metallopeptidase activity [GO:0008237]; proteolysis [GO:0006508]	PF10253;	0.174376	81.2549
Uncharacterized protein	C0H5I2	PF3D7_1352400			0.114452	78.0219
Uncharacterized protein	C0H5J2	PF3D7_1359600			0.252985	73.5626
Uncharacterized protein	C0H5L1	PF3D7_1367900	integral component of membrane [GO:0016021]		0.066967	79.1527
Uncharacterized protein	C0H5L5	PF3D7_1369200			0.207318	80.2675
Uncharacterized protein	C6KSM6	PF3D7_0602600		PF03399;	0.180975	77.6875
Uncharacterized protein	C6KSP3	PF3D7_0604500		PF02213;	0.274386	73.69
Uncharacterized protein	C6KSR4	PF3D7_0606600	P-body [GO:0000932]; deadenylation-independent decapping of nuclear-transcribed mRNA [GO:0031087]		0.174313	78.4838
Spindle assembly abnormal protein 6, putative	C6KSS4	PF3D7_0607600		PF16531;	0.267197	77.3371
Protein PFF0380w	C6KSS5	PFF0380w		PF14418;	0.174504	84.0579
Uncharacterized protein	C6KST1	PF3D7_0608300			0.250604	83.1661
Uncharacterized protein	C6KST7	PF3D7_0609000			0.196719	88.0394
SWI/SNF-related matrix-associated actin-dependent regulator of chromatin	C6KSV9	PF3D7_0611400		PF02201;	0.184842	81.0001
Uncharacterized protein	C6KSZ9	PF3D7_0615800			0.148199	81.9238
Uncharacterized protein	C6KT07	PF3D7_0616600		PF15072;	0.0821967	83.1024
Vacuolar transporter chaperone, putative	C6KT60	PF3D7_0622300	cytoplasm [GO:0005737]; integral component of membrane [GO:0016021]	PF09359;	0.0905504	82.6724
Uncharacterized protein	C6KT96	PF3D7_0626000			0.301253	79.7419
Uncharacterized protein	C6KT98	PF3D7_0626200			0.135081	88.6128
RAP protein, putative	C6KTC4	PF3D7_0628900			0.175748	83.9305
Conserved Plasmodium protein	C6S3D0	PF10_0177b PF3D7_1018300	integral component of membrane [GO:0016021]		0.123121	86.1283
Uncharacterized protein	C6S3I5	PF14_0345a PF3D7_1436400			0.184429	84.3446
Uncharacterized protein	O77314	PF3D7_0303100	nucleus [GO:0005634]; polynucleotide 5'-hydroxyl-kinase activity [GO:0051731]; cleavage in ITS2 between 5.8S rRNA and LSU-rRNA of tricistronic rRNA transcript (SSU-rRNA, 5.8S rRNA, LSU-rRNA) [GO:0000448]	PF16575;	0.149206	75.0597
Uncharacterized protein	O77320	PF3D7_0307900			0.130652	75.1075
Uncharacterized protein	O77348	PF3D7_0311900	integral component of membrane [GO:0016021]		0.126957	77.2415
Uncharacterized protein	O77372	PF3D7_0318500	Ino80 complex [GO:0031011]; integral component of membrane [GO:0016021]; ATPase activity [GO:0016887]; chromatin remodeling [GO:0006338]; DNA repair [GO:0006281]; transcription, DNA-templated [GO:0006351]		0.0530789	76.5886
Uncharacterized protein PFC0810c	O77374	PFC0810c			0.0923198	75.9038
Conserved Plasmodium protein	O96158	PF3D7_0206500 PFB0285c			0.321851	77.0186
Conserved Plasmodium protein	O96205	PF3D7_0212500 PFB0560w	integral component of membrane [GO:0016021]		0.307255	73.913
Conserved Plasmodium protein	O96223	PF3D7_0214300 PFB0650w			0.275346	75.5056
Conserved Plasmodium membrane protein	O96228	PF3D7_0214800 PFB0675w	integral component of membrane [GO:0016021]		0.0542113	74.0563
Conserved Plasmodium protein	O96253	PF3D7_0217200 PFB0800c			0.185991	82.1627
Inner membrane complex protein 1a, putative	O97228	PF3D7_0304000		PF12314;	0.0510398	81.9716
Uncharacterized protein	O97236	PF3D7_0305100	integral component of membrane [GO:0016021]		0.218002	82.1468
EB1 homolog, putative	O97251	PF3D7_0307300	microtubule [GO:0005874]; microtubule binding [GO:0008017]	PF03271;	0.217558	76.8752
Uncharacterized protein	O97254	PF3D7_0307600			0.124008	81.462
Uncharacterized protein	O97261	PF3D7_0314500			0.103423	82.4653
Uncharacterized protein	O97287	PF3D7_0321100			0.104046	81.3027
Microtubule and actin binding protein, putative	O97291	PF3D7_0321700			0.134488	78.9297
Regulator of chromosome condensation, putative	Q8I1Q1	PF3D7_0418600			0.0747857	79.0093
Uncharacterized protein	Q8I1Y3	PF3D7_0404600	integral component of membrane [GO:0016021]		0.163771	76.3815
Bromodomain protein, putative	Q8I240	PF3D7_0110500			0.137031	81.7805
Uncharacterized protein	Q8I259	PF3D7_0108300			0.144539	77.4964
Asparagine-rich antigen Pfa35-2	Q8I284	PF3D7_0105700	Set1C/COMPASS complex [GO:0048188]; histone H3-K4 methylation [GO:0051568]		0.174726	78.4997
Uncharacterized protein	Q8I2B2	PF3D7_0102800	integral component of membrane [GO:0016021]; lipid storage [GO:0019915]	PF06775;	0.0760176	81.239
Gametocytogenesis-implicated protein	Q8I2G4	PF3D7_0935600			0.190368	77.5919
Uncharacterized protein	Q8I2M7	PF3D7_0928200	integral component of membrane [GO:0016021]		0.169647	88.1032
Uncharacterized protein	Q8I2P4	PF3D7_0926500	integral component of membrane [GO:0016021]		0.261345	82.0035
Uncharacterized protein	Q8I2Q1	PF3D7_0925800	cytoplasm [GO:0005737]; exon-exon junction complex [GO:0035145]; polysome [GO:0005844]; nuclear-transcribed mRNA catabolic process, nonsense-mediated decay [GO:0000184]		0.25262	84.7427
Uncharacterized protein	Q8I2R3	PF3D7_0924400			0.292893	80.8408
Uncharacterized protein	Q8I2R5	PF3D7_0924200			0.0968374	80.8727
TLD domain-containing protein	Q8I2V5	PF3D7_0919800		PF07534;	0.0769695	79.9331
Uncharacterized protein	Q8I2X9	PF3D7_0917400			0.0840755	78.1493
Uncharacterized protein	Q8I2Y3	PF3D7_0917000	condensin complex [GO:0000796]; mitotic chromosome condensation [GO:0007076]		0.0637156	80.3631
Uncharacterized protein	Q8I2Z9	PF3D7_0915300			0.0645228	77.8467
Uncharacterized protein	Q8I350	PF3D7_0910200			0.0652054	73.9767
GTPase-activating protein, putative	Q8I379	PF3D7_0907200	endomembrane system [GO:0012505]; intracellular [GO:0005622]; GTPase activator activity [GO:0005096]; Rab GTPase binding [GO:0017137]; activation of GTPase activity [GO:0090630]; intracellular protein transport [GO:0006886]; regulation of vesicle fusion [GO:0031338]	PF00566;	0.201664	83.8827
Uncharacterized protein	Q8I3B3	PF3D7_0903500			0.0689641	74.7571
Uncharacterized protein	Q8I3G1	PF3D7_0530700	cytoplasm [GO:0005737]		0.140121	79.6305
Uncharacterized protein	Q8I3L2	PF3D7_0525300	integral component of membrane [GO:0016021]		0.195418	77.1141
Structural maintenance of chromosomes protein 6,putative	Q8I3L3	PF3D7_0525200			0.0712893	79.8694
Carbon catabolite repressor protein 4, putative	Q8I3R5	PF3D7_0519500		PF03372;	0.178257	75.3463
WD repeat-containing protein 26, putative	Q8I3S4	PF3D7_0518600		PF00400;	0.145177	74.9323
RAP protein, putative	Q8I3S7	PF3D7_0518100	integral component of membrane [GO:0016021]	PF08373;	0.0508153	77.4327
Uncharacterized protein	Q8I3X5	PF3D7_0513200	nucleus [GO:0005634]; nucleic acid binding [GO:0003676]	PF03178;	0.0743677	79.5349
Uncharacterized protein	Q8I3Y1	PF3D7_0512500			0.122929	86.9724
Uncharacterized protein	Q8I414	PF3D7_0508900			0.159277	78.3564
GTPase-activating protein, putative	Q8I435	PF3D7_0506700	endomembrane system [GO:0012505]; intracellular [GO:0005622]; GTPase activator activity [GO:0005096]; Rab GTPase binding [GO:0017137]; activation of GTPase activity [GO:0090630]; intracellular protein transport [GO:0006886]; regulation of vesicle fusion [GO:0031338]	PF00566;	0.146606	79.726
Centrosomal protein CEP120, putative	Q8I455	PF3D7_0504700			0.0885472	83.0387
Uncharacterized protein	Q8I462	PF3D7_0503900	integral component of membrane [GO:0016021]		0.206686	82.0194
Conserved Plasmodium protein	Q8I4S0	PF3D7_1251400 PFL2470c	integral component of membrane [GO:0016021]		0.0825022	82.306
THO complex subunit 2, putative	Q8I4T6	PF3D7_1249800 PFL2390c	integral component of membrane [GO:0016021]; THO complex part of transcription export complex [GO:0000445]; mRNA binding [GO:0003729]; mRNA export from nucleus [GO:0006406]	PF11262;	0.165337	80.8249
Conserved Plasmodium protein	Q8I4T7	PFL2385c			0.232675	82.4812
Uncharacterized protein	Q8I548	PF3D7_1237500 PFL1815c			0.116655	75.3782
Uncharacterized protein	Q8I590	PFL1600c			0.181479	88.0554
Asparagine-rich protein, putative	Q8I5A3	PF3D7_1231800 PFL1530w			0.215783	78.436
Uncharacterized protein	Q8I5B0	PFL1495w			0.0754612	77.4327
Conserved Plasmodium protein	Q8I5C0	PFL1445w		PF00566;	0.32149	79.9331
Cyclin related protein, putative	Q8I5E2	PF3D7_1227600 PFL1335w			0.0698275	78.9616
Conserved Plasmodium protein	Q8I5E4	PF3D7_1227400 PFL1325c			0.0910806	76.0949
RAP protein, putative	Q8I5F2	PF3D7_1226500 PFL1280w		PF08373;	0.126605	79.5986
Uncharacterized protein	Q8I5Q0	PF3D7_1215700 PFL0755c			0.0664469	82.0672
Uncharacterized protein	Q8I5Q2	PF3D7_1215400 PFL0745c	integral component of membrane [GO:0016021]		0.121984	83.8987
Uncharacterized protein	Q8I5Q5	PF3D7_1215100 PFL0730w	integral component of membrane [GO:0016021]; nuclear envelope [GO:0005635]; protein membrane anchor [GO:0043495]; nuclear envelope organization [GO:0006998]	PF07738;	0.198331	86.9883
Uncharacterized protein	Q8I5T8	PF3D7_1211200 PFL0555c			0.112918	80.6338
Uncharacterized protein	Q8I5U3	PF3D7_1210600 PFL0530c			0.143189	82.9272
General transcription factor 3C polypeptide 5,putative	Q8I5U5	PF3D7_1210400 PFL0520c	transcription factor TFIIIC complex [GO:0000127]; RNA polymerase III type 1 promoter transcriptional preinitiation complex assembly [GO:0000999]; transcription from RNA polymerase III type 2 promoter [GO:0001009]	PF09734;	0.202789	84.265
Conserved Plasmodium protein	Q8I5W6	PF3D7_1208100 PFL0405w	integral component of membrane [GO:0016021]		0.159689	75.0756
Conserved Plasmodium protein	Q8I5X6	PFL0345w			0.09644	79.9808
Conserved Plasmodium protein	Q8I5Y2	PFL0315c			0.205306	75.7763
HAD domain ookinete protein, putative	Q8I5Z3	PF3D7_1205200 PFL0260c			0.15114	79.7738
Transporter, putative	Q8I611	PF3D7_1203400 PFL0170w	integral component of membrane [GO:0016021]		0.0773459	78.5156
Plasmodium falciparum 3D7 chromosome 8	Q8IAP1				0.178654	78.9775
Asparagine-rich antigen Pfa55-14	Q8IAS8	PF3D7_0809200			0.0784882	82.9749
Uncharacterized protein	Q8IAV2	PF3D7_0811700	integral component of membrane [GO:0016021]		0.108661	81.4779
Uncharacterized protein	Q8IAW4	PF3D7_0812900	integral component of membrane [GO:0016021]		0.114505	84.0738
Uncharacterized protein	Q8IAY2	PF3D7_0814500			0.162716	79.8853
Clp1-related protein, putative	Q8IB50	PF3D7_0821600	nucleus [GO:0005634]; ATP binding [GO:0005524]; polynucleotide 5'-hydroxyl-kinase activity [GO:0051731]; mRNA cleavage [GO:0006379]; mRNA polyadenylation [GO:0006378]; tRNA splicing, via endonucleolytic cleavage and ligation [GO:0006388]	PF16573;PF16575;	0.16096	81.4779
Uncharacterized protein	Q8IB92	PF3D7_0825900			0.0662441	80.0605
Uncharacterized protein	Q8IBC1	PF3D7_0829000	integral component of membrane [GO:0016021]		0.121927	79.8853
Uncharacterized protein	Q8IBF4	PF3D7_0730500			0.107764	80.9683
Uncharacterized protein	Q8IBH6	PF3D7_0728100	anaphase-promoting complex [GO:0005680]; integral component of membrane [GO:0016021]		0.182202	83.6598
Uncharacterized protein	Q8IBI0	PF3D7_0727700			0.101133	82.2583
Uncharacterized protein	Q8IBK0	PF3D7_0725100	integral component of membrane [GO:0016021]; DNA binding [GO:0003677]; DNA-templated transcription, initiation [GO:0006352]		0.118414	75.8082
Uncharacterized protein	Q8IBL9	PF3D7_0723400			0.152083	75.633
Uncharacterized protein	Q8IBN6	PF3D7_0721500	integral component of membrane [GO:0016021]		0.113931	80.4745
Uncharacterized protein	Q8IBN9	PF3D7_0721200			0.101626	77.6716
Uncharacterized protein	Q8IBU8	PF3D7_0715200			0.147063	76.6682
Uncharacterized protein	Q8IBV5	PF3D7_0714200			0.196574	78.8342
Uncharacterized protein	Q8IBY8	PF3D7_0710200			0.0992063	78.7227
Uncharacterized protein	Q8IBZ1	PF3D7_0709900	integral component of membrane [GO:0016021]	PF05990;	0.149898	79.1368
Cg7 protein	Q8IBZ5	PF3D7_0709400			0.239584	75.3463
Uncharacterized protein	Q8IC18	PF3D7_0705200			0.18668	81.9875
Plasmodium falciparum 3D7 chromosome 7	Q8IC31				0.122838	81.5416
Uncharacterized protein	Q8IC38	PF3D7_0703200			0.121067	78.006
Uncharacterized protein	Q8ID17	PF3D7_1369300			0.0779028	78.229
Uncharacterized protein	Q8ID19	PF3D7_1369100			0.1278	81.0957
Plasmodium falciparum 3D7 chromosome 13	Q8ID45				0.0817414	79.6942
Uncharacterized protein	Q8ID46	PF3D7_1366300			0.101129	90.6035
Uncharacterized protein	Q8ID63	PF3D7_1364400	integral component of membrane [GO:0016021]		0.126706	75.4578
Uncharacterized protein	Q8ID65	PF3D7_1364200			0.212098	84.7587
Uncharacterized protein	Q8IDA6	PF3D7_1359900	integral component of membrane [GO:0016021]	PF05990;	0.218516	82.2742
NLI interacting factor-like phosphatase,putative (EC 3.1.3.16)	Q8IDE5	PF3D7_1355700	phosphoprotein phosphatase activity [GO:0004721]	PF03031;	0.190498	77.783
Uncharacterized protein	Q8IDE6	PF3D7_1355600			0.0606567	77.5282
RAP protein, putative	Q8IDE9	PF3D7_1355200		PF08373;	0.0978662	81.7964
Uncharacterized protein	Q8IDG0	PF3D7_1354100			0.122645	84.3287
Uncharacterized protein	Q8IDH7	PF3D7_1352300			0.11718	84.7905
Uncharacterized protein	Q8IDL5	PF3D7_1348400	integral component of membrane [GO:0016021]		0.269947	82.5609
Uncharacterized protein	Q8IDM9	PF3D7_1346900			0.0788686	79.4394
Uncharacterized protein	Q8IDT2	PF3D7_1340400			0.0939327	75.8082
Uncharacterized protein	Q8IDZ7	PF3D7_1333100			0.102858	76.0471
Uncharacterized protein	Q8IE41	PF3D7_1328000			0.142634	79.4712
Uncharacterized protein	Q8IE65	PF3D7_1325400			0.169608	89.6639
Vacuolar protein sorting-associated protein 52,putative	Q8IE79	PF3D7_1323800	cytosol [GO:0005829]; GARP complex [GO:0000938]; Rab GTPase binding [GO:0017137]; syntaxin binding [GO:0019905]; endocytic recycling [GO:0032456]; Golgi to vacuole transport [GO:0006896]; retrograde transport, endosome to Golgi [GO:0042147]	PF04129;	0.258316	85.125
Uncharacterized protein	Q8IEC6	PF3D7_1319000			0.165502	77.9741
Uncharacterized protein	Q8IEG2	PF3D7_1315300			0.0851777	76.7001
Uncharacterized protein	Q8IEH4	PF3D7_1314000	integral component of membrane [GO:0016021]		0.14451	80.0445
Uncharacterized protein	Q8IEL1	PF3D7_1310400			0.151624	81.2549
Erythrocyte membrane-associated antigen	Q8IFP4	PF3D7_0422200			0.197522	81.0001
Conserved Plasmodium protein	Q8IHQ0	PF11_0479 PF3D7_1146800			0.262004	85.5072
Uncharacterized protein	Q8IHU4	PF11_0433 PF3D7_1142100			0.111664	74.7571
Conserved Plasmodium protein	Q8IHW8	PF11_0408 PF3D7_1139800			0.203459	85.0453
Conserved Plasmodium protein (WD repeat-containing protein, putative)	Q8IHX6	PF11_0400 PF3D7_1138800			0.244812	77.576
Conserved Plasmodium protein	Q8IHX8	PF11_0398 PF3D7_1138700			0.271179	74.0245
Uncharacterized protein	Q8IHY4	PF11_0392 PF3D7_1138000			0.133856	79.3279
Uncharacterized protein	Q8IHZ8	PF11_0378 PF3D7_1136600			0.0890656	82.322
Uncharacterized protein	Q8II02	PF11_0373 PF3D7_1136200			0.23991	74.0404
Conserved Plasmodium protein	Q8II07	PF11_0368 PF3D7_1135600	condensed chromosome, centromeric region [GO:0000779]; integral component of membrane [GO:0016021]; nuclear condensin complex [GO:0000799]; chromatin binding [GO:0003682]; histone binding [GO:0042393]; chromosome separation [GO:0051304]; meiotic chromosome condensation [GO:0010032]; mitotic chromosome condensation [GO:0007076]		0.143544	76.5886
Uncharacterized protein	Q8II22	PF11_0353 PF3D7_1134200			0.0727763	78.2449
Conserved Plasmodium protein	Q8II33	PF11_0341 PF3D7_1133100	integral component of membrane [GO:0016021]		0.0977103	88.4535
Uncharacterized protein	Q8II50	PF11_0324 PF3D7_1131400	integral component of membrane [GO:0016021]		0.229312	83.3572
Uncharacterized protein	Q8II83	PF11_0291 PF3D7_1128000.1			0.294445	74.6137
Uncharacterized protein	Q8II99	PF11_0275 PF3D7_1126500			0.125803	80.6816
Kelch motif containing protein, putative (Kelch protein, putative)	Q8IIA6	PF11_0268 PF3D7_1125800			0.0570853	74.9004
Uncharacterized protein	Q8IIC8	PF11_0246 PF3D7_1123500	integral component of membrane [GO:0016021]		0.200293	82.1946
Uncharacterized protein	Q8IIE1	PF11_0233 PF3D7_1122500			0.0633587	74.3271
Uncharacterized protein	Q8IIG8	PF11_0206 PF3D7_1119900		PF12931;	0.171781	77.783
Uncharacterized protein	Q8IIM6	PF11_0144 PF3D7_1113600			0.0878455	77.0664
Uncharacterized protein	Q8IIP6	PF11_0123 PF3D7_1111700			0.172509	84.4083
Conserved Plasmodium protein	Q8IIU1	PF11_0073 PF3D7_1106200			0.126493	81.0479
CCR4-NOT transcription complex subunit 1,putative	Q8IIW4	PF11_0049 PF3D7_1103800	CCR4-NOT core complex [GO:0030015]; integral component of membrane [GO:0016021]; P-body [GO:0000932]; protein complex scaffold activity [GO:0032947]; negative regulation of translation [GO:0017148]; nuclear-transcribed mRNA catabolic process, deadenylation-dependent decay [GO:0000288]	PF16417;PF12842;PF04054;	0.275567	74.5182
Uncharacterized protein	Q8IJ33	PF10_0367 PF3D7_1037400			0.268243	84.042
Conserved Plasmodium protein	Q8IJ39	PF10_0361			0.1551	78.2767
Uncharacterized protein	Q8IJ43	PF10_0357 PF3D7_1036500			0.121904	74.9482
Asparagine-rich antigen (mRNA-decapping enzyme subunit 1, putative)	Q8IJ85	PF10_0314 PF3D7_1032100	P-body [GO:0000932]; enzyme activator activity [GO:0008047]; enzyme regulator activity [GO:0030234]; mRNA binding [GO:0003729]; deadenylation-dependent decapping of nuclear-transcribed mRNA [GO:0000290]; deadenylation-independent decapping of nuclear-transcribed mRNA [GO:0031087]	PF06058;	0.251141	78.6908
Uncharacterized protein	Q8IJA2	PF10_0296 PF3D7_1030300			0.130908	79.5031
Conserved Plasmodium protein	Q8IJE4	PF10_0254			0.123205	80.1082
Conserved Plasmodium protein	Q8IJE8	PF10_0250 PF3D7_1025500	integral component of membrane [GO:0016021]; microtubule motor activity [GO:0003777]; microtubule-based movement [GO:0007018]		0.0885742	81.462
Conserved Plasmodium membrane protein	Q8IJF0	PF10_0248 PF3D7_1025400	integral component of membrane [GO:0016021]		0.217833	76.716
Uncharacterized protein	Q8IJF5	PF10_0243 PF3D7_1024900			0.205135	78.1016
10b antigen, putative	Q8IJI4	PF10_0213 PF3D7_1021900		PF12796;PF10258;	0.175959	82.7679
Conserved Plasmodium membrane protein	Q8IJI6	PF10_0211 PF3D7_1021700	integral component of membrane [GO:0016021]	PF12624;	0.247999	76.7319
Conserved Plasmodium protein	Q8IJJ2	PF10_0205 PF3D7_1021100	integral component of membrane [GO:0016021]		0.201502	84.3764
Uncharacterized protein	Q8IJJ7	PF10_0198 PF3D7_1020500	ribosomal large subunit binding [GO:0043023]; negative regulation of ribosome biogenesis [GO:0090071]; negative regulation of translation [GO:0017148]		0.0884876	77.576
Eukaryotic translation initiation factor subunit eIF2A, putative	Q8IJL2	PF10_0183 PF3D7_1019000	cytosolic small ribosomal subunit [GO:0022627]; mRNA binding [GO:0003729]; ribosome binding [GO:0043022]; translation initiation factor activity [GO:0003743]; tRNA binding [GO:0000049]	PF08662;PF02213;	0.270882	80.7931
Plasmodium exported protein (PHISTc)	Q8IJN1	PF10_0162 PF3D7_1016700	integral component of membrane [GO:0016021]	PF09687;	0.130065	75.7923
Uncharacterized protein	Q8IJP1	PF10_0151 PF3D7_1015400		PF08585;	0.0648727	76.3338
NLI interacting factor-like phosphatase,putative (EC 3.1.3.16)	Q8IJR8	PF10_0124 PF3D7_1012700	DNA-directed RNA polymerase II, holoenzyme [GO:0016591]; CTD phosphatase activity [GO:0008420]; dephosphorylation of RNA polymerase II C-terminal domain [GO:0070940]	PF03031;	0.109155	81.446
Small subunit rRNA synthesis-associated protein,putative	Q8IJV3	PF10_0089 PF3D7_1009200	integrator complex [GO:0032039]; snRNA processing [GO:0016180]		0.113001	79.4871
WD repeat-containing protein, putative	Q8IJZ5	PF10_0045 PF3D7_1004200	integral component of membrane [GO:0016021]		0.143352	80.4586
Uncharacterized protein	Q8IK87	PF14_0719 PF3D7_1475100			0.305618	88.772
Trailer hitch homolog, putative	Q8IK89	PF14_0717 PF3D7_1474900		PF12701;	0.081509	76.1904
Uncharacterized protein	Q8IK98	PF14_0708 PF3D7_1474000	integral component of membrane [GO:0016021]		0.163706	73.8334
Uncharacterized protein	Q8IK99	PF14_0707 PF3D7_1473900		PF10453;	0.102597	78.659
Uncharacterized protein	Q8IKA2	PF14_0704 PF3D7_1473500			0.201345	81.3346
Uncharacterized protein	Q8IKC0	PF14_0686			0.0957945	79.0093
Uncharacterized protein	Q8IKC3	PF14_0683 PF3D7_1471600			0.0762192	74.6456
Uncharacterized protein	Q8IKF6	PF14_0649 PF3D7_1468100			0.10969	76.5249
Uncharacterized protein	Q8IKJ2	PF14_0613 PF3D7_1464500	integral component of membrane [GO:0016021]		0.120903	78.7068
Uncharacterized protein	Q8IKL6	PF14_0588			0.195645	77.7353
Uncharacterized protein	Q8IKM7	PF14_0577 PF3D7_1460500			0.102658	73.6741
Uncharacterized protein	Q8IKN5	PF14_0569 PF3D7_1459600			0.0650019	75.1552
Spindle assembly abnormal protein 4, putative	Q8IKP6	PF14_0558 PF3D7_1458500			0.145598	80.1082
Uncharacterized protein	Q8IKR2	PF14_0540 PF3D7_1456700	cytosol [GO:0005829]; nuclear pore [GO:0005643]; nucleoplasm [GO:0005654]; nuclear localization sequence binding [GO:0008139]; protein transporter activity [GO:0008565]; NLS-bearing protein import into nucleus [GO:0006607]		0.177736	79.4712
Ferlin, putative	Q8IKS2	PF14_0530 PF3D7_1455600	integral component of membrane [GO:0016021]	PF00168;	0.173897	80.9205
Uncharacterized protein	Q8IKT1	PF14_0521 PF3D7_1454800			0.0508994	76.9549
Uncharacterized protein	Q8IKT9	PF14_0512 PF3D7_1453900			0.165053	80.379
Uncharacterized protein	Q8IKU7	PF14_0504 PF3D7_1453000			0.0786209	79.2482
Uncharacterized protein	Q8IKV0	PF14_0501 PF3D7_1452600	protein transport [GO:0015031]	PF16213;	0.222403	79.7579
Uncharacterized protein	Q8IKZ0	PF14_0461 PF3D7_1448300			0.157889	76.3338
Calponin homology domain-containing protein,putative	Q8IKZ7	PF14_0454 PF3D7_1447800			0.0627149	74.7571
Uncharacterized protein	Q8IL08	PF14_0442 PF3D7_1446500		PF13634;	0.148948	73.8811
Uncharacterized protein	Q8IL12	PF14_0438 PF3D7_1446100			0.0762905	77.6875
Uncharacterized protein	Q8IL47	PF14_0402 PF3D7_1442400			0.192255	76.6204
Uncharacterized protein	Q8IL69	PF14_0380 PF3D7_1440100		PF04825;	0.198131	78.3405
Metacaspase-like protein	Q8IL84	PF14_0363 PF3D7_1438400			0.275024	73.8652
Ataxin-2 like protein, putative	Q8ILA7	PF14_0338 PF3D7_1435700.1	cytoplasmic stress granule [GO:0010494]; RNA binding [GO:0003723]; regulation of cytoplasmic mRNA processing body assembly [GO:0010603]; stress granule assembly [GO:0034063]	PF06741;PF14438;	0.240414	79.0093
Uncharacterized protein	Q8ILA8	PF14_0337 PF3D7_1435600			0.0727913	76.493
Uncharacterized protein	Q8ILD1	PF14_0313 PF3D7_1433200	integral component of membrane [GO:0016021]		0.0779792	80.0605
Uncharacterized protein	Q8ILI1	PF14_0262		PF00400;	0.157813	84.4561
Uncharacterized protein	Q8ILJ1	PF14_0252 PF3D7_1427300			0.0957469	90.7787
Uncharacterized protein	Q8ILJ6	PF14_0247 PF3D7_1426800			0.335333	87.2431
Uncharacterized protein	Q8ILL7	PF14_0226 PF3D7_1423500	membrane [GO:0016020]; mitochondrion [GO:0005739]		0.0769944	80.0605
Uncharacterized protein	Q8ILM6	PF14_0217 PF3D7_1422700		PF02622;	0.183631	73.9608
Uncharacterized protein	Q8ILN9	PF14_0204 PF3D7_1421100			0.0539272	79.8853
Uncharacterized protein	Q8ILP5	PF14_0199	integral component of membrane [GO:0016021]	PF12430;PF12537;	0.149875	82.3379
Uncharacterized protein	Q8ILP9	PF14_0195 PF3D7_1420100		PF14418;	0.147988	77.1938
Uncharacterized protein	Q8ILQ6	PF14_0188 PF3D7_1419400	integral component of membrane [GO:0016021]		0.22843	76.5886
Liver specific protein 1, putative	Q8ILR5	PF14_0179 PF3D7_1418100			0.187941	80.8886
Cysteine protease ATG4, putative (EC 3.4.22.-)	Q8ILS3	PF14_0171 PF3D7_1417300	cytoplasm [GO:0005737]; cysteine-type peptidase activity [GO:0008234]; autophagy [GO:0006914]; protein transport [GO:0015031]	PF03416;	0.184667	79.9331
NOT family protein, putative	Q8ILS4	PF14_0170 PF3D7_1417200	CCR4-NOT core complex [GO:0030015]; P-body [GO:0000932]; protein complex scaffold activity [GO:0032947]; negative regulation of translation [GO:0017148]; nuclear-transcribed mRNA catabolic process, deadenylation-dependent decay [GO:0000288]	PF12842;PF04054;	0.271611	77.369
Uncharacterized protein	Q8ILS9	PF14_0165 PF3D7_1416600			0.156576	75.6967
Uncharacterized protein	Q8ILU2	PF14_0152 PF3D7_1415400			0.126137	82.4494
Uncharacterized protein	Q8ILV3	PF14_0140 PF3D7_1414200			0.077758	78.9297
Uncharacterized protein	Q8ILX3	PF14_0120 PF3D7_1412100	MCM complex [GO:0042555]; nuclear chromatin [GO:0000790]; chromatin binding [GO:0003682]; DNA-dependent DNA replication [GO:0006261]; sister chromatid cohesion [GO:0007062]	PF09739;	0.0669341	76.5727
Uncharacterized protein	Q8ILY5	PF14_0108 PF3D7_1411000.1			0.117187	87.6891
WD repeat-containing protein, putative	Q8ILZ2	PF14_0101 PF3D7_1410300	Pwp2p-containing subcomplex of 90S preribosome [GO:0034388]; small-subunit processome [GO:0032040]; snoRNA binding [GO:0030515]; maturation of SSU-rRNA from tricistronic rRNA transcript (SSU-rRNA, 5.8S rRNA, LSU-rRNA) [GO:0000462]		0.172366	73.7378
Uncharacterized protein PF14_0093	Q8IM00	PF14_0093			0.0757927	79.4394
Uncharacterized protein	Q8IM09	PF14_0084 PF3D7_1408700		PF12340;PF12359;	0.185728	83.8827
Uncharacterized protein	Q8IM18	PF14_0073 PF3D7_1407600			0.0783737	80.2834
Uncharacterized protein	Q8IM32	PF14_0059 PF3D7_1406200	transcription factor activity, core RNA polymerase II binding [GO:0000991]; nucleobase-containing compound metabolic process [GO:0006139]; regulation of DNA-templated transcription, elongation [GO:0032784]	PF14635;	0.0941457	82.306
Uncharacterized protein	Q8IM33	PF14_0058 PF3D7_1406100	cilium [GO:0005929]; phosphatidylinositol binding [GO:0035091]; protein localization to cilium [GO:0061512]	PF01167;	0.169231	84.9657
Plasmodium falciparum 3D7 chromosome 3	Q9NF99				0.251929	76.6523
Conserved Plasmodium protein	Q9TY98	PF3D7_0204100 PFB0190c		PF08238;	0.136898	76.8434
Phosphopantothenoylcysteine synthetase,putative (EC 6.3.2.5)	Q9U0G7	PF3D7_0412300	phosphopantothenate--cysteine ligase activity [GO:0004632]	PF04127;	0.120484	83.9305
Uncharacterized protein	Q9U0H0	PF3D7_0412000	integral component of membrane [GO:0016021]	PF10601;	0.124933	83.1342
Uncharacterized protein	Q9U0J3	PF3D7_0409300			0.143515	75.8082
Uncharacterized protein	Q9U0K5	PF3D7_0408100			0.0825935	74.5978
Uncharacterized protein	Q9U0K8	PF3D7_0407800			0.266068	75.7445
Uncharacterized protein	Q9U0L0	PF3D7_0407600			0.136496	79.6464
